# Supplementary material for: Will Greenland be the last refuge for the continental European small-white orchid?Niche modeling of future distribution of Pseudorchis albida
Source: Frontiers journal article supplement (doi:10.3389/fenvs.2022.912428), 2022-12-28

Overlap of suitable niches of *P. albida* ssp. *albida* (green shade) and its pollinators (red hatch) in the present time (A) and according to SSP1-2.6 (B), SSP2-4.5 (C), SSP3-7.0 (D) and SSP5-8.5 (E) climate change scenarios.

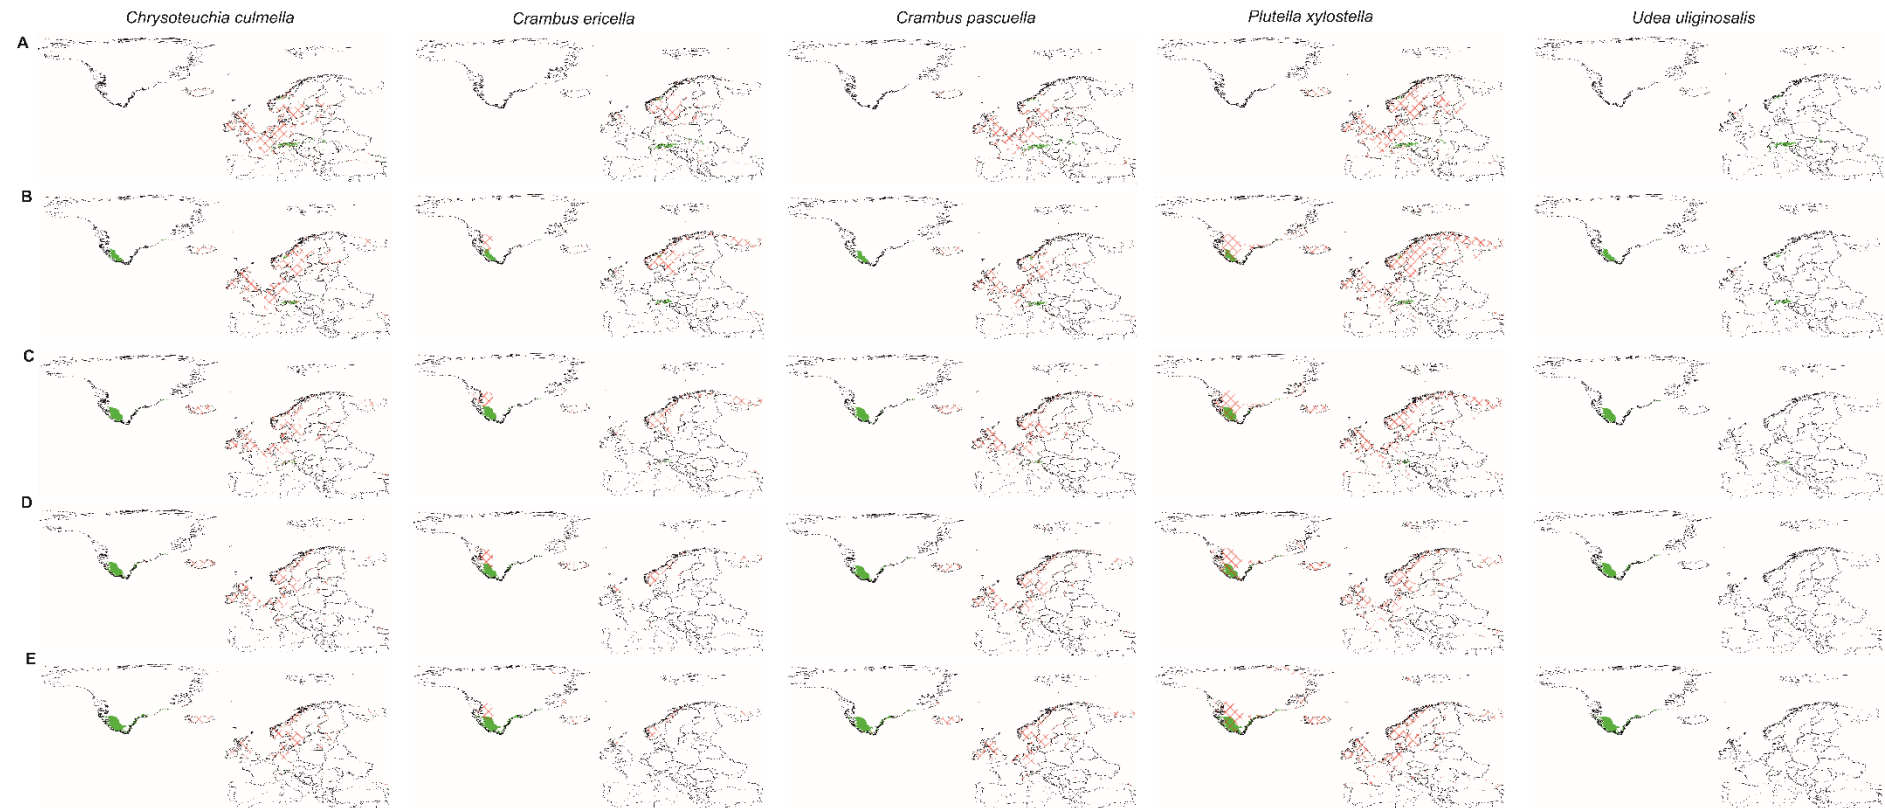

Overlap of suitable niches of *P. albida* ssp. *straminea* (green shade) and its pollinators (red hatch) in the present time (A) and according to SSP1-2.6 (B), SSP2-4.5 (C), SSP3-7.0 (D) and SSP5-8.5 (E) climate change scenarios.

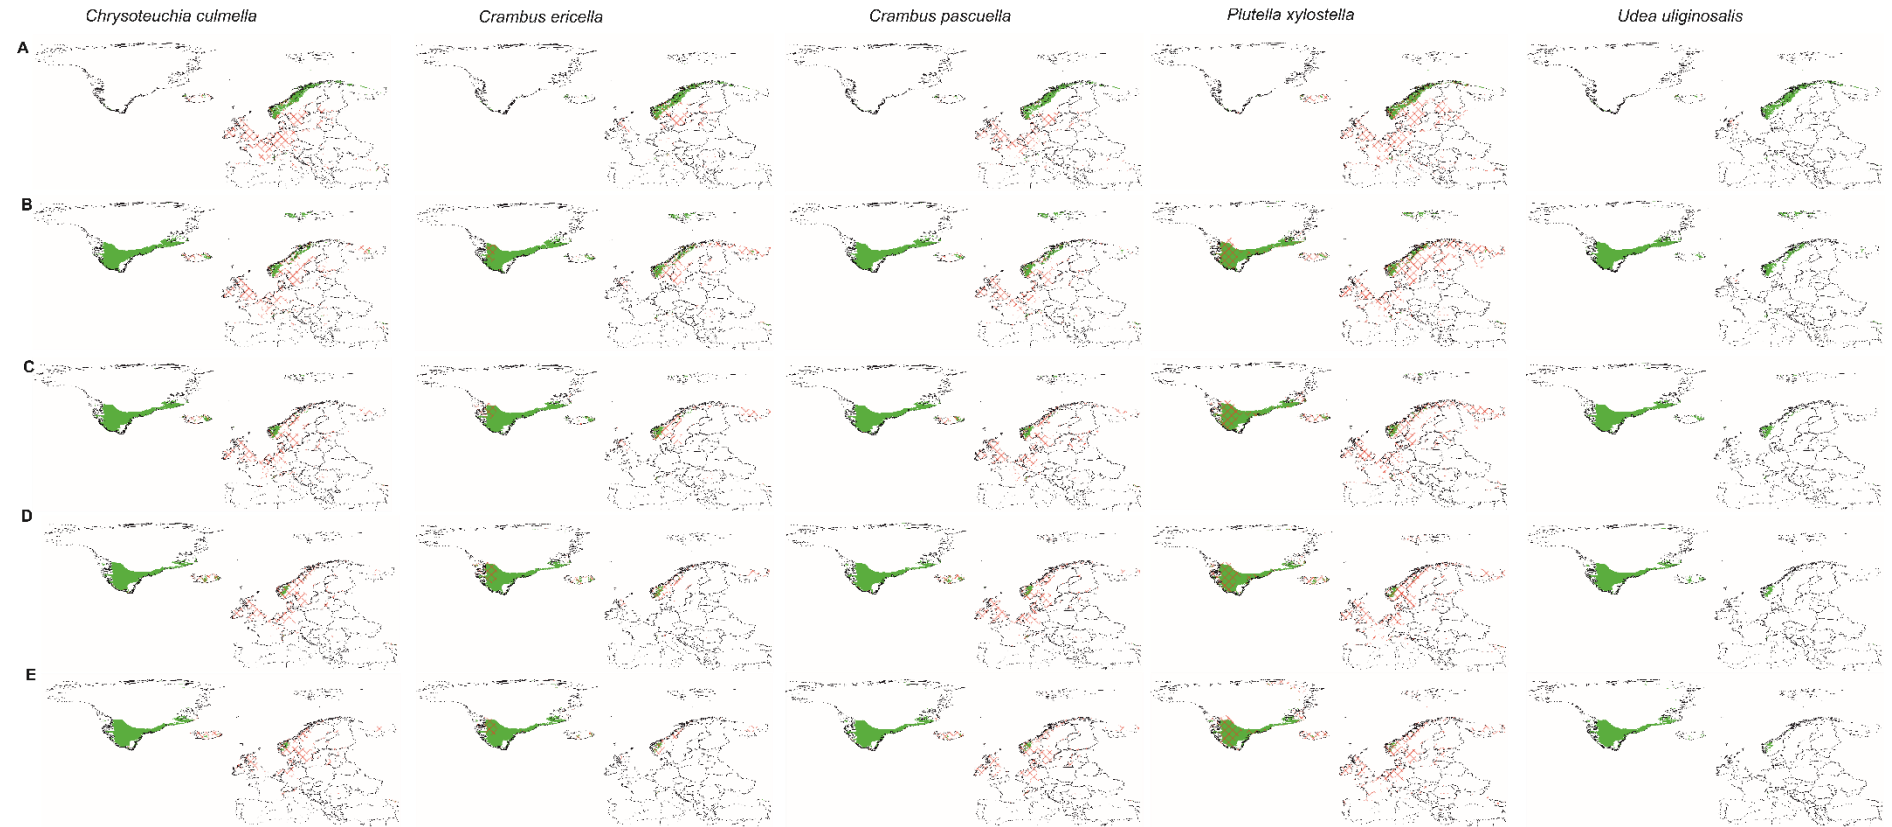

Supplement: Data_Sheet_4.PDF [file Data_Sheet_4.PDF]
