# Supplementary material for: Will Greenland be the last refuge for the continental European small-white orchid?Niche modeling of future distribution of Pseudorchis albida
Source: Frontiers journal article supplement (doi:10.3389/fenvs.2022.912428), 2022-12-28
Supplement: Table_1.DOCX [file Table_1.DOCX]

Suplementary Table 1. List of GBIF Occurrence Download used in the study.

| Taxon | DOI |
| --- | --- |
| Pseudorchis albida subsp. albida | https://doi.org/10.15468/dl.gqjv3j |
| Pseudorchis albida subsp. straminea | https://doi.org/10.15468/dl.3y9gfq |
| Pseudorchis albida subsp. tricuspis | https://doi.org/10.15468/dl.yk2qkx |
| Chrysoteuchia culmella | https://doi.org/10.15468/dl.ubwe9s |
| Crambus ericella | https://doi.org/10.15468/dl.ve3kd4 |
| Crambus pascuella | https://doi.org/10.15468/dl.wb57eu |
| Plutella xylostella | https://doi.org/10.15468/dl.enxkd4 |
| Udea uliginosalis | https://doi.org/10.15468/dl.hwu3nr |
