# Supplementary material for: Will Greenland be the last refuge for the continental European small-white orchid?Niche modeling of future distribution of Pseudorchis albida
Source: Frontiers journal article supplement (doi:10.3389/fenvs.2022.912428), 2022-12-28
Supplement: Table_2.xlsx [file Table_2.xlsx]

## Sheet: Arkusz1
Factor coordinates of the cases based on correlation
Factor 1	Factor 2	Factor 3	Factor 4	Factor 5	Factor 6	Factor 7	Factor 8	Factor 9	Factor 10	Factor 11	Factor 12	Factor 13	Factor 14	Factor 15	Factor 16	Factor 17	Factor 18	Factor 19	Cases
-1.68271	-2.78015	-1.56283	-0.481515	-1.95652	-0.262744	0.402453	0.0677643	-0.571654	-0.0119583	-0.0202434	0.0178127	0.0590262	0.0125098	-0.0778843	-0.0699478	-0.0115478	-0.0194256	0.00452442	PAA
-2.42236	-1.30753	0.0440751	0.352663	-1.36555	0.230096	-0.160245	0.197264	-0.503254	0.0233446	-0.164264	0.0967105	0.0116004	-0.0540534	-0.0571934	-0.0613018	0.0142725	-0.0427661	0.00152785	PAA
-0.933085	-1.34078	-0.263754	-0.369901	-1.07526	0.261408	-0.38563	-0.13314	-0.47818	-0.155295	-0.0477507	-0.0211372	0.0806884	-0.0177019	-0.0822547	-0.0987115	0.00726558	-0.0268952	0.00688738	PAA
0.870436	-0.0434796	-1.62054	-1.01603	0.251496	0.751293	0.516631	-0.310326	0.156712	0.0876489	-0.0105418	-0.0734414	0.0177441	0.00840141	0.0120719	0.0830474	-0.00942108	-0.0371775	0.00458986	PAA
0.937193	1.09249	-0.704865	-2.54598	0.34273	-0.662309	-0.0753279	0.0978826	-0.148011	0.0873323	-0.070201	-0.125361	0.0033925	-0.0542935	0.0692437	0.0464367	0.00230329	-0.0276579	0.000318427	PAA
1.74087	-0.803556	-0.267559	-0.742136	-2.10664	-0.0782943	-1.06272	-0.358219	0.159599	0.092461	0.0373256	-0.166915	-0.0370672	0.0641022	0.0967315	-0.0736438	0.0273334	-0.0148479	0.00744362	PAA
2.90958	0.766977	0.151149	1.69871	-2.7915	-0.51103	-1.03525	-0.142265	0.35479	0.00202766	-0.0203822	-0.114181	-0.0589566	0.0505954	0.01439	-0.042548	0.0364085	2.16423e-05	-0.0126156	PAA
-2.24857	0.809271	1.59484	0.250057	0.518175	1.58538	-1.09095	1.08112	0.157735	-0.172043	-0.0329246	0.0391764	-0.0689811	-0.0527498	-0.0064339	-0.0234075	0.00780535	-0.00479767	0.00570551	PAA
-3.61087	2.08949	2.72347	0.299499	0.110879	1.23526	-0.365089	0.204083	-0.317098	-0.105319	0.215384	0.0685403	-0.0491085	0.154317	-0.00924357	-0.0335429	0.0536949	0.0112599	-0.000265835	PAA
0.0289192	1.55074	3.49803	1.21192	-0.64951	1.15468	-1.13992	1.36762	-0.351595	-0.116532	-0.0266006	0.0874431	-0.0210842	-0.0714053	-0.0129363	-0.0490735	0.00423554	-0.0493489	-0.00468772	PAA
0.368575	2.3104	0.46495	1.11805	-2.46992	-0.440698	0.244867	0.10002	0.752976	-0.246593	-0.138063	0.0358252	0.070916	-0.183949	0.109426	0.109365	0.0836267	0.0951221	0.00674522	PAA
-1.27799	2.12912	1.66752	-1.37055	-0.450803	0.602228	0.301954	-0.0378356	-0.328567	-0.0588276	-0.0915867	0.134832	-0.0710015	-0.104271	-0.00923026	-0.00201699	0.016753	0.0430896	-0.000573336	PAA
-5.04781	1.92221	1.37872	-1.21884	3.05584	3.98664	-0.429771	-0.696255	0.456008	-0.136329	0.103454	0.0427995	-0.122575	0.140913	0.00225734	-0.0682658	0.038839	-0.0329302	-0.000262502	PAA
2.12616	0.56253	0.58701	0.380169	-2.40998	1.62827	-0.311619	-0.301928	0.0769527	0.0792812	-0.0503665	-0.0412041	0.0872738	-0.0786909	-0.0336992	0.0855636	0.0161348	-0.00912555	0.00258845	PAA
-2.74629	3.83895	0.230862	-1.32821	-1.68203	-0.513652	0.675176	0.01675	0.620424	-0.197692	-0.00892741	0.136043	0.00305615	-0.0371783	0.0200252	-0.0163986	0.0463661	0.000811941	0.036313	PAA
-3.15112	1.11608	-3.20931	-0.992391	-0.949186	1.78023	0.581886	-1.42122	0.680316	-0.152662	-0.103422	0.329729	0.0715353	-0.0589893	-0.00766493	-0.0765847	-0.0295996	0.0556125	0.0242059	PAA
-3.30107	3.71047	3.7098	-1.29769	2.16043	3.13705	-0.777363	-0.0514922	-0.176129	-0.124046	0.381255	-0.0537813	-0.0109873	0.331464	0.0605385	0.0137464	0.00887292	-0.0580442	-0.00144334	PAA
-2.7288	6.59204	0.849442	-2.34157	-0.621523	-1.40001	0.54851	0.466515	0.339081	-0.0906042	0.357669	0.105355	0.00865424	0.119907	0.0282895	-0.035732	0.0231139	-0.00401711	-0.0177119	PAA
-3.71667	4.46745	-0.722421	-2.76353	-0.365656	0.0279589	0.839743	-0.296208	0.389763	0.126749	-0.0232212	0.0711097	-0.144909	0.0133588	-0.113174	-0.00126333	-0.00393222	-0.042767	0.0212288	PAA
-2.51645	2.0161	-2.6391	-1.47925	-0.568688	2.23544	0.472527	-1.2558	0.337666	-0.10398	-0.181263	0.276862	0.107775	-0.0745607	-0.0157056	0.0291597	-0.00876393	0.129836	-0.0117168	PAA
-3.69787	5.18049	-0.685289	-3.2018	-0.0112131	-0.0702028	0.766206	-0.18197	0.266291	0.141766	0.0290448	0.015915	-0.114336	0.0257128	-0.0867744	-0.0111503	-0.0137563	-0.0251451	0.00417708	PAA
-2.69251	5.51851	-0.656838	-2.26377	-0.526887	-0.234877	0.517695	0.154518	0.360006	0.0924797	-0.0207768	-0.0560244	-0.0570611	-0.0505032	-0.0937133	-0.00634366	-0.0409324	-0.0516988	0.00064353	PAA
-2.73621	2.36509	-2.89845	-1.18819	-0.996057	1.97908	0.420125	-1.03501	0.493339	-0.121189	-0.150311	0.319156	0.101607	-0.120111	0.0231665	-0.0181637	-0.0303607	0.089006	0.000774381	PAA
-3.43447	5.57795	-0.55486	-3.03946	-0.488529	-0.33433	0.587932	0.160758	0.32121	0.14135	0.0880661	0.0101838	-0.100003	0.0270639	-0.0917139	0.0081459	-0.020634	-0.0454929	0.00579923	PAA
-2.91783	5.43383	-0.869546	-2.49485	-0.471757	0.0700646	0.524483	0.0713403	0.298278	0.181243	-0.0371151	-0.0291663	-0.0999786	-0.0457205	-0.107002	-0.00982235	-0.0491299	-0.0519921	-0.0027748	PAA
-2.93927	4.37044	-1.22012	-2.13469	-0.949365	0.680756	0.486359	-0.15502	0.37397	0.168297	-0.0879529	-0.053344	-0.0877926	-0.117812	-0.0813915	0.00731877	-0.0359086	-0.024595	0.0219317	PAA
-2.70112	7.06702	-0.0382574	-2.23254	-0.936525	-0.693938	0.270049	0.546549	0.332937	-0.0341612	0.259399	0.0713262	0.00405417	-0.0151298	-0.00689254	0.0280336	-0.0310577	-0.0211443	-0.0278813	PAA
-1.63444	4.74058	1.08578	-0.415287	2.08571	3.96583	-1.48727	0.111353	-0.71775	0.0419349	0.0580527	-0.529727	0.377539	-0.0512858	-0.177846	0.054037	-0.0541024	0.041912	-0.0657311	PAA
-0.712267	-4.66814	3.95653	-0.82182	-0.18967	-2.22764	1.25757	0.206066	0.760594	0.00522075	0.0796674	-0.0962467	0.256889	-0.0586244	0.0159704	-0.0821968	-0.158951	-0.00661936	-0.111186	PAS
-0.339006	-4.1075	4.27924	0.649801	1.04886	-0.451991	0.0727249	0.605878	1.24085	-0.345104	0.207472	-0.0281305	0.12457	-0.123366	0.00705039	-0.00376206	-0.114235	-0.0287947	-0.0522162	PAS
0.402277	-2.10738	5.02995	-0.737756	-0.425522	-1.5984	1.33074	-0.306624	0.165692	-0.179836	0.160313	-0.109905	0.152803	-0.113622	-0.0793564	0.0173267	-0.0668705	0.0102846	-0.0388505	PAS
1.39095	-3.3454	2.00611	-0.800216	0.179233	-0.982511	0.605652	-0.717242	0.489247	-0.108758	0.0737124	0.0333926	0.0465375	-0.0346317	0.035826	0.0778576	-0.00066702	-0.0426353	-0.00495548	PAS
-8.69251	-3.33809	-2.43	1.3266	-0.120139	-1.55982	0.678546	-0.076971	0.318101	-0.107983	-0.0725477	-0.0120379	-0.0539792	-0.101487	-0.0645402	0.0390186	-0.0947458	-0.0527778	-0.0884253	PAS
-10.0956	0.0958962	-1.10951	1.96623	1.36816	-1.99753	0.894893	-0.587503	-0.0542023	-0.214106	0.0304221	-0.226763	-0.054755	0.0507101	0.11283	0.047235	-0.0157683	-0.00844277	-0.0758318	PAS
-9.84943	-2.2777	-2.10565	1.38349	0.559103	-1.41964	0.751234	-0.226718	0.504011	-0.0605117	-0.107255	-0.0615239	-0.147344	-0.0189244	-0.0460873	0.123757	-0.0554779	-0.0512525	-0.0942095	PAS
1.30356	-2.84365	2.61594	-1.37108	0.596838	-0.884336	0.674435	-0.556392	0.172655	-0.102153	0.0287731	-0.037296	0.0767398	-0.0465623	0.008683	-0.00577366	0.00405091	-0.0330295	-0.00750042	PAS
2.54128	-1.75482	1.93154	-0.492799	0.00197453	-2.00591	0.731075	-0.446832	0.254231	-0.164307	-0.0114373	0.0838208	-0.0156872	-0.0203785	0.0101781	0.0533741	0.0480386	0.000665355	0.0142061	PAS
-6.38892	-2.63957	-3.01406	1.31361	-0.0719308	-2.17963	0.27893	-0.223766	-0.0440366	-0.169939	0.0077347	-0.0697263	0.0641584	-0.138614	0.0295854	-0.0124677	-0.0272805	-0.0400402	-0.0290467	PAS
-0.145126	-1.9198	5.35732	0.258388	-0.901244	-0.402019	1.38365	-0.911429	0.0778262	-0.170128	0.222642	0.0633258	0.0918072	-0.12095	-0.0976198	0.00673201	-0.0764189	0.0176023	-0.0585097	PAS
1.77225	-1.90081	2.69826	-1.39791	0.466668	-1.29102	0.485811	-0.0554464	0.193126	-0.0831968	-0.0210493	-0.0552662	0.112863	-0.0171081	-0.0184305	-0.000427377	0.0214839	-0.0327183	0.0119571	PAS
1.05123	-3.95244	1.20772	-1.29471	1.60968	0.26872	-0.91099	-0.26227	0.631618	0.010577	0.137245	0.0337184	0.203225	0.108518	0.179218	-0.0707707	-0.00825371	-0.0516276	0.0090859	PAS
2.95038	-1.69691	0.929796	-0.506214	1.39482	-0.855995	-0.0910237	-0.457938	0.405039	0.0158758	0.0249724	0.138848	0.0711517	0.0925548	0.0904036	0.0928915	0.0543806	-0.028086	0.0411478	PAS
-10.579	0.765125	-1.17394	1.89468	1.03386	-1.89079	0.876109	-0.643858	-0.263366	-0.352227	0.210036	-0.102742	0.0189888	0.056435	0.153507	0.0116428	-0.0128565	-0.00784325	-0.0560956	PAS
0.329135	-2.73319	2.55918	1.19589	0.551067	0.56415	-0.0928247	-0.244816	0.163941	0.0783119	0.00302107	0.0357941	0.0298196	-0.0406488	-0.0785964	0.0496353	-0.0137907	-0.0864681	-0.0200135	PAS
-0.278057	-3.98836	3.24074	0.0838591	-0.402231	0.392371	-0.127995	0.674387	0.686207	0.0542212	0.0974533	0.0472678	0.136219	-0.0556887	-0.0583318	0.0291907	-0.0875634	-0.0335013	-0.0250145	PAS
2.42251	-0.913679	2.14101	-1.75725	-0.112816	-2.74278	0.566727	0.51163	-0.0330374	-0.0572414	-0.06639	0.108921	0.0109698	0.00803065	0.00914419	-0.0174218	0.035892	0.0180923	0.00957081	PAS
1.68979	-2.80207	2.14097	-1.58788	0.161557	-0.579763	0.606205	-0.332058	0.124845	-0.0893399	0.00909466	0.108991	0.117463	-0.0881863	0.0979328	0.0123312	-0.00971688	-0.00710126	-8.36294e-05	PAS
2.22068	-0.566635	2.48781	-0.00872393	0.568172	-0.891367	0.836621	-0.93307	-0.0150257	-0.171724	-0.115766	0.201118	0.00372656	-0.0404119	-0.0405514	0.0115753	0.0533158	-0.010768	-0.00501097	PAS
-4.58325	-0.57076	-0.756981	0.152498	1.88555	-0.687134	0.589858	-0.700122	0.503605	0.0338781	-0.171968	-0.0832122	-0.0488072	0.040431	-0.0873059	-0.00184855	0.0341225	-0.00804095	-0.00866397	PAS
3.63208	-0.584956	0.975503	0.897097	1.02485	-0.192158	0.532138	-1.07152	0.123506	-0.118469	0.0257393	0.0932365	0.0523908	-0.0159631	-0.0107158	0.0893131	0.0558348	-0.0325883	0.0464946	PAS
-3.80769	-0.641131	-0.919604	0.413513	1.65382	-0.68644	0.325369	-0.392587	0.313083	0.0365796	-0.181899	-0.0167323	-0.0806579	-0.0141858	-0.039555	-0.021732	0.0198602	0.0242746	-0.00657425	PAS
4.47448	1.03687	0.328322	2.42591	0.333748	-1.68968	-0.0331578	-0.714302	0.431168	-0.0921149	0.0615333	0.106886	-0.100997	0.0453544	-0.0791226	0.0940944	0.0603734	-0.0388393	0.0731667	PAS
2.88977	-1.11587	1.08852	0.606995	0.729524	0.292396	0.751477	-1.20379	0.171137	-0.04586	-0.0193941	-0.0438206	0.0694088	0.0125774	0.00964151	0.022184	0.079471	-0.0354029	0.0201132	PAS
-2.55076	-1.12085	-0.99863	0.322729	1.1841	-0.802942	-0.122347	-0.239622	0.199627	-0.0751641	-0.0374395	-0.0858755	-0.100282	-0.0361323	-0.0698671	-0.0256471	-0.00231189	0.0158724	0.0121882	PAS
0.849195	-1.60701	2.43537	-1.82803	-0.285587	-1.60756	0.47306	0.4693	0.116181	0.0179588	-0.0160676	0.0439428	-0.0401241	-0.0470302	0.0251018	0.0388773	0.0115166	0.00986099	-0.00879813	PAS
1.46334	-3.07662	2.1512	-0.957874	0.241216	-0.0542746	-0.465541	0.535129	0.566032	0.0666013	0.0749996	0.0679373	0.112466	-0.0453725	0.132406	-0.0104968	-0.0409307	-0.015712	0.0127291	PAS
-3.77223	0.289482	-0.417685	0.352687	2.0364	-0.615905	0.458014	-0.535531	0.265255	0.0558388	-0.212861	-0.130793	-0.0444552	-0.0164353	-0.0488849	0.00236812	0.0502532	0.020013	0.00177975	PAS
2.39595	-1.5397	0.665726	-0.314587	0.358633	-0.354143	0.750155	-0.632591	0.148119	-0.0420559	0.00581776	-0.0800434	0.0564835	0.00835092	0.0569657	-0.0537392	0.0526959	-0.0228007	0.0221495	PAS
2.95631	-1.15807	1.09266	0.726726	0.54578	0.170949	0.621593	-1.14383	0.0700742	-0.109343	-0.0106303	0.0911702	0.0156069	-0.0194917	0.0461507	0.0395091	0.0637383	-0.0108865	0.00907632	PAS
-7.23868	0.453838	0.710861	0.44912	0.556116	-0.762185	1.3553	-1.2921	0.130276	0.0196131	0.217261	-0.100339	-0.167085	0.0588391	-0.0232861	-0.00886527	-0.00794834	0.0424797	-0.0370255	PAS
-2.217	-1.30621	-1.1238	-0.0355926	1.59156	-0.451313	-0.44839	-0.105068	0.569748	-0.189664	0.0303087	-0.074713	0.15261	0.0280587	-0.0616667	-0.097438	-0.0130371	-0.0246184	0.0390918	PAS
1.95587	-1.26505	2.78392	-0.0902978	1.39937	0.294373	-0.376408	0.261777	0.191779	-0.137094	-0.0185757	0.139762	0.0558769	-0.0723669	0.0676077	0.0285245	0.0239485	-0.019537	0.000329952	PAS
-6.01115	-0.671473	-0.177118	1.00186	1.14869	-0.398148	-0.0112322	0.283456	0.502945	-0.0118411	-0.0603076	-0.0269879	-0.138895	-0.027409	-0.0260649	-0.00474135	-0.0122593	-0.000499695	-0.0198808	PAS
3.49474	-0.49956	0.698334	1.1208	0.0136208	-0.736552	-0.322999	-1.51158	0.302376	-0.0891785	0.167697	0.00486999	0.00821841	-0.0247141	-0.0513353	0.0634974	0.00486546	-0.0454518	0.0581213	PAS
-3.53206	-0.413716	-0.727361	-0.0812666	1.87565	-0.330845	0.191258	-0.447908	0.395482	-0.0705775	-0.131008	-0.0787054	0.142887	0.0565609	-0.129517	-0.0716397	0.0195612	-0.0221227	0.0161646	PAS
1.90668	-2.29569	2.25139	-1.34312	-0.387785	-0.607427	0.316336	0.0315214	0.0998975	0.0660268	0.043337	-0.00150329	0.0647831	-0.103869	0.050443	0.0784601	-0.00657495	-0.0100081	0.0127075	PAS
-0.296544	-1.64688	3.25324	-1.91211	-0.0717271	-0.493738	0.933468	-0.290811	-0.0896232	0.0887786	0.0105272	0.0528801	-0.0128158	-0.0879222	0.00156114	0.00428726	-0.0139259	0.0101351	-0.0218481	PAS
-4.39795	1.4013	0.534278	0.487263	2.04669	-0.584756	0.82721	-0.831207	0.119646	-0.0176611	-0.172761	-0.0364151	0.00331055	0.0420217	-0.106284	0.0057356	0.0525278	0.00510829	-0.00863741	PAS
-0.0156754	-2.63802	-0.207615	-0.811825	0.23494	-0.366873	-0.101056	-0.310015	0.19514	0.121264	0.0685275	-0.0744599	0.0356352	0.0514761	0.0307173	0.00673611	0.00655202	0.0350796	0.00527359	PAS
2.61354	-1.81903	0.690942	-1.10788	2.00933	1.01741	0.671467	-0.356029	0.00642303	-0.0563584	0.00960819	0.0870538	0.18734	0.00869392	0.161598	0.0488747	0.0609069	-0.0318918	0.0161934	PAS
3.26275	-0.0707472	1.43195	1.035	0.0207164	-0.937283	0.114334	-0.759888	0.0696809	-0.0555738	-0.0471632	0.216971	-0.0534474	-0.0181345	-0.0181437	-0.025383	0.0139229	-0.000797403	0.0139145	PAS
-1.5261	-2.5705	-1.34078	-0.412869	-0.0625831	-0.857556	-0.783576	-0.7378	0.373141	0.00937166	0.180097	-0.171327	0.0505399	0.0343989	-0.0148326	-0.0151302	-0.0246475	0.0566756	0.0256329	PAS
-0.517105	-4.52469	1.83056	0.419576	-1.11758	1.22175	-0.0286475	-0.354126	0.260643	0.261311	0.0108891	0.198462	-0.12914	-0.0570698	0.0271746	0.0724123	-0.0708376	-0.0392334	-0.0398524	PAS
-2.77473	-2.14061	-0.780571	-0.197963	0.203563	-0.445861	-0.105419	-0.179593	0.462129	-0.00285179	0.0308065	-0.0826113	0.084298	-0.0215736	-0.0365917	-0.0278929	-0.0205929	0.0528475	0.0112568	PAS
-2.24096	0.306994	1.87831	0.656256	1.00623	-0.390492	0.443601	-0.298782	0.00429405	0.319788	-0.234686	-0.121653	0.167314	0.105512	-0.132631	-0.020506	0.041003	-0.0335614	-0.008319	PAS
3.36335	-1.12783	0.876392	-1.38573	1.2353	-0.507055	-0.47965	-1.54848	-0.215716	0.0377959	0.0718223	0.12945	0.0877574	0.0704696	0.0993548	0.0485804	0.040874	-0.0169613	0.0166926	PAS
-0.416899	-1.40168	0.314635	-0.223558	1.15713	-0.142362	-0.257726	-0.28994	0.14505	0.0861312	-0.0751856	0.0544617	-0.0831276	0.00357739	0.0807829	-0.0381637	0.0213461	0.0254305	-0.011456	PAS
3.10456	0.654062	2.35535	0.472207	0.207099	-1.18547	0.482849	-0.321004	-0.0882405	-0.00675257	-0.16792	0.211195	-0.0577419	-0.0159205	-0.027942	0.0406612	0.0687297	0.00592838	-0.00949083	PAS
0.421484	-1.72781	-0.144647	-0.499565	0.834506	-0.399429	-0.723806	-0.556944	0.0921103	0.00227841	0.0952977	-0.0668159	-0.116411	0.0368118	0.00106501	-0.0746473	-0.0139971	0.0120715	0.0129406	PAS
4.19113	0.825012	0.37388	2.23478	0.491675	-0.383492	0.955672	-0.167379	0.259847	0.0715748	-0.0989237	0.0522089	-0.0198041	0.10007	-0.0462879	-0.000380629	0.0803843	-3.88443e-05	0.0224257	PAS
-4.46164	-2.50423	-1.29254	0.138562	-0.305368	-0.375124	0.134445	-0.192051	0.529269	0.109213	-0.0720892	0.0166923	0.0151664	-0.00609111	-0.0159757	-0.00371311	-0.0198944	0.0706962	-0.0138051	PAS
-3.14651	-1.3772	-0.682063	0.172668	0.555073	-0.440202	-0.199801	0.156763	0.475243	-0.0175262	0.0255328	-0.153225	0.093996	-0.0857914	-0.0488718	-0.00314974	-0.0196111	0.0512204	0.026673	PAS
-2.41948	-0.424128	1.12151	0.90479	1.34225	-0.0333467	-0.309212	0.502053	0.354488	0.157031	-0.160448	0.116188	-0.121991	-0.0274548	0.0528646	-0.0237376	0.0128	-0.00094034	-0.0219468	PAS
-4.09197	0.952215	0.657492	0.455208	1.53046	-0.373668	0.709727	-0.654827	0.0319341	-0.123595	-0.123173	0.060415	0.12736	0.0068329	-0.150183	-0.0521735	0.0115404	-0.0078631	-0.000372062	PAS
2.76693	-0.859092	0.295909	-0.136813	0.400497	-0.616374	0.482082	-0.430243	-0.383827	-0.0960323	-0.0132273	0.140708	-0.173946	0.031627	-0.0234808	-3.01611e-06	0.0265896	0.0230002	-0.00718602	PAS
-2.83541	-2.02505	-0.59179	-0.142984	0.272453	-0.255229	-0.11588	-0.108071	0.342513	0.0699777	0.00831355	-0.137746	-0.135116	-0.0434259	-0.0604723	-0.019717	-0.0262025	-0.00103222	0.007887	PAS
-1.48269	-0.852592	1.30619	0.537773	1.04412	0.0424121	-0.305924	0.399967	0.315055	0.0853079	-0.107576	0.0563827	-0.0856313	-0.055298	0.0403456	-0.0114588	0.00757832	-0.0012333	-0.0118054	PAS
1.55999	-2.11612	0.0198361	-0.31507	-0.0452085	0.390501	1.33526	-0.589137	-0.371618	-0.0644825	0.0116848	0.0130555	-0.112119	0.025521	-0.0591177	0.0163248	0.0375759	0.00479627	-0.016545	PAS
1.94442	-1.96127	0.115639	0.0634763	0.00523259	0.646791	1.49186	-0.15282	-0.214994	-0.161902	0.0578426	-0.11517	-0.0991449	-0.0211233	-0.0499539	-0.0704149	0.0284502	0.00730866	-0.000524941	PAS
-7.52955	-0.535526	1.85461	1.65056	-1.57415	-0.419163	0.992174	-0.812458	0.236237	-0.632698	-0.260658	-0.171414	-0.175064	0.00724071	0.181263	0.0339205	-0.289458	0.00855744	0.0370245	PAS
-2.73228	-1.29171	0.255989	0.437786	0.597551	-0.310314	-0.281009	0.321232	0.149397	0.351172	-0.125022	-0.0661681	-0.0184661	0.0167576	-0.0137704	-0.0576663	-0.000732394	-0.0208728	-0.00760551	PAS
-1.17312	-1.76326	0.201891	-0.368083	0.803781	0.0347064	-0.199584	-0.347539	0.115908	0.213249	-0.0901522	0.0387557	-0.153014	0.033805	0.0444344	-0.0307797	0.0143269	0.0115083	-0.0223358	PAS
-0.622164	-1.02487	0.0889209	0.0048292	1.09188	-0.266347	-0.396078	-0.123135	0.0432103	0.158172	-0.0680403	0.0119114	-0.0495596	0.0136744	0.0200862	-0.063799	0.00598138	0.0237111	-0.00273217	PAS
-2.08463	-0.0767889	-0.408628	0.441462	1.69643	-0.310187	-0.2614	0.00461126	0.187148	-0.0467511	-0.131246	-0.0449715	-0.0806746	-0.0169764	-0.0168805	-0.00818216	0.0421853	0.026258	-0.00188955	PAS
3.91538	1.68556	-0.636811	2.37008	0.733336	-0.87505	0.39794	-0.49084	0.340434	0.046407	0.186166	0.10976	-0.00129719	-0.094221	-0.0314821	-0.0614007	-0.0604859	0.00121975	0.0873166	PAS
0.714981	-2.26535	-0.128134	-0.57417	0.315322	-0.198511	-0.521906	-0.439275	0.0907837	0.069719	0.058551	0.124676	-0.156781	0.0664057	0.0402223	-0.0120794	-0.0232561	0.0132756	-0.00588513	PAS
-1.10925	-1.74981	3.81798	0.15615	0.200805	0.904005	-0.286118	0.597594	0.554868	-0.180143	0.156552	0.0579493	-0.0571188	-0.100405	-0.0209411	-0.0237554	-0.053028	-0.0221935	-0.00618619	PAS
-3.32979	-1.96879	-2.87027	0.408256	-0.275623	-1.19068	-0.509624	-0.417434	0.0818001	0.0487187	0.0473217	0.0666341	0.107514	0.0426962	0.0150111	0.0980036	0.0126788	0.0205623	0.00772784	PAS
1.51783	-1.52249	-0.601896	0.292835	1.14497	1.05115	1.08905	0.625252	0.289765	-0.16553	0.108116	-0.153656	-0.0512007	-0.028423	0.0251178	0.0671539	0.0395554	-0.0153017	0.0257081	PAS
-2.54616	0.210302	2.86544	0.80629	0.0679466	-0.293293	0.532629	-0.304771	-0.176591	0.332158	-0.113834	-0.0797347	0.101581	0.0803346	-0.0434108	-0.0405405	0.0248819	-0.00609323	-0.0237825	PAS
-0.794229	-0.954968	0.431665	0.247054	0.870839	-0.180465	-0.326859	0.0451221	0.114593	0.105397	-0.0850541	0.0609988	-0.138486	-0.0215138	0.0258734	-0.0606887	0.00114455	0.0206161	-0.0110607	PAS
0.650438	-1.6194	-0.228126	-0.633693	0.234657	-0.551422	-0.281725	-1.0813	-0.345798	0.197264	0.038576	0.0407582	-0.109471	0.0486745	-0.0347927	-0.0403086	-0.0214626	0.00238977	0.000922017	PAS
0.606362	-1.57908	-0.400302	-0.466072	0.709417	-0.463937	-0.798366	-0.425253	-0.0630197	0.083995	0.0792534	-0.0622684	-0.0861873	0.0453054	0.036782	-0.0491391	-0.00286801	0.0148048	0.00885265	PAS
-2.46333	-0.659162	1.07138	0.383395	0.533406	-0.130493	0.161546	-0.0767024	0.0132953	0.352664	-0.183064	-0.0317239	0.0492427	0.0198128	-0.0328499	-0.0885202	0.00900602	0.0174905	-0.0154333	PAS
-0.700185	-1.21393	-0.226699	-0.164105	0.937682	-0.251342	-0.462466	-0.211426	0.00897685	0.304375	-0.0613136	-0.0591676	-0.0467666	0.0153762	0.0522102	-0.0947195	-0.00655967	0.0415341	0.00153802	PAS
-0.0901324	-1.05727	0.155075	-0.121758	0.954738	-0.179076	-0.466963	-0.170538	0.0606514	0.0521884	-0.0317806	0.0154546	-0.118478	0.0197991	0.00204863	-0.0706497	0.00220249	0.0213932	-0.00438141	PAS
-0.584429	-1.52949	0.0233126	-0.234038	0.58264	-0.17293	-0.425119	-0.198087	0.0760401	0.147467	-0.02252	-0.0321007	-0.141981	0.0201715	-0.00891168	-0.0764769	-0.0133758	0.0124813	-0.00258081	PAS
4.31153	1.09653	0.334837	1.88171	0.707058	-0.461901	0.288608	-0.292459	0.214617	0.0839781	-0.0351581	0.133388	-0.0165675	0.0465856	-0.00951452	0.00312664	0.0238464	0.00474601	0.0268363	PAS
3.00424	-0.712267	0.358781	-0.324538	0.569533	-0.157141	0.632139	-0.414081	-0.452974	-0.0899859	0.000329358	-0.0192403	-0.0773064	0.0241035	-0.0318149	-0.0343198	0.0419289	-0.00375622	-0.0017088	PAS
2.04336	-1.17777	-0.522854	0.0595305	0.811348	0.880619	1.60741	0.0340579	-0.126807	-0.0819242	0.0346248	-0.0706322	-0.0103382	0.00988153	-0.0242353	0.0619702	0.0484623	-0.0168729	0.0105696	PAS
-2.73761	-1.09914	0.677842	0.527767	0.702538	0.0564831	-0.261841	0.368252	0.176234	0.225907	-0.151726	0.110744	-0.0458003	0.0127275	0.00781611	-0.0614291	0.000351001	-0.00779287	-0.0225969	PAS
2.4815	-0.561807	-0.741204	0.480526	0.794551	0.550402	1.59993	0.2668	0.176494	0.0439254	0.038774	-0.0804227	0.0495667	0.00737537	0.0786262	-0.0649292	0.0284638	-0.0187056	0.0301262	PAS
2.48349	-0.82057	-0.406183	0.382061	0.598389	0.418716	1.33003	0.276183	-0.17462	-0.158154	0.0574395	-0.00385254	-0.0196512	-0.0346027	-0.0356705	0.047865	0.0151399	-0.00550653	0.0203462	PAS
3.59227	-0.208929	0.559097	0.473135	1.47222	0.964199	0.936965	-0.828094	-0.0966861	0.0364502	-0.0573643	0.2065	0.0683539	0.0164468	0.0859479	0.0962626	0.0622617	-0.0250381	0.000312493	PAS
-3.98248	-0.512644	-0.227837	0.574439	1.10082	-0.195668	-0.403491	0.49103	0.424509	0.0584139	-0.0328939	-0.164056	-0.153462	-0.0973692	-0.0177006	0.0336518	0.00116235	-0.000616842	0.0120628	PAS
-0.832241	-1.13709	0.00648465	-0.118367	0.974218	-0.0886322	-0.376262	-0.128297	0.0406182	0.285007	-0.0748782	-0.00430706	-0.0893749	0.00612433	0.0302028	-0.0765462	-0.0102801	0.0340068	-0.00355438	PAS
0.455301	-0.520545	0.134635	-0.121094	0.636878	-0.554799	-0.199361	-0.459904	-0.210798	-0.0386405	-0.00609024	-0.134623	-0.0379695	-0.050469	-0.043185	-0.00629422	0.0233773	0.0130688	0.0133635	PAS
-1.09245	0.125135	0.10224	0.923326	1.32163	-0.424521	-0.50753	0.421694	-0.0287201	-0.0707699	-0.114037	-0.0032591	-0.176477	-0.0506569	-0.0404646	0.0755966	0.0446431	-0.000514334	-0.00817612	PAS
0.635314	-0.799316	-1.05751	-0.378379	0.996346	-0.363267	-0.120331	-0.216526	-0.0444733	-0.243048	0.107704	-0.106467	0.147286	-0.0200068	-0.074589	-0.0723391	-0.0212364	-0.00312183	0.0457035	PAS
0.725148	-0.906583	-0.135827	-0.40932	0.528315	-0.532995	-0.115784	-0.846166	-0.41019	0.167557	-0.0316214	0.00186715	-0.0520628	0.0377021	-0.051835	-0.0993134	-0.0106974	0.0255904	0.000806597	PAS
-1.17431	-2.62133	-1.29598	-0.545358	-0.570943	-0.450565	0.193433	0.189767	-0.013336	-0.0315099	0.084475	-0.0623115	-0.133027	-0.0165154	-0.04606	-0.0221016	-0.0361313	0.0258908	0.00804385	PAS
-2.96862	-2.12443	-2.88169	-0.0407402	-0.504894	-0.924452	0.551823	0.339026	-0.0021344	0.153196	-0.041467	0.0396537	0.107113	0.0627134	-0.00692178	0.113363	0.0254389	0.027479	0.00199847	PAS
-4.24447	-1.10324	1.55489	1.33666	0.221562	0.732462	-0.0415872	-0.0299721	0.220207	0.203893	-0.0368179	-0.0138278	0.259454	-0.0248994	-0.0336062	-0.0748543	-0.0233498	0.0309927	-0.00476786	PAS
-2.19234	-0.373636	0.479275	0.185063	0.961432	-0.0337901	0.0516684	-0.0858367	0.192733	0.10181	-0.126415	-0.0992977	-0.0951632	-0.0502561	-0.0511535	0.0189566	0.020078	0.0166696	-0.000212833	PAS
0.543252	-1.07654	-0.0872324	-0.447402	0.421815	-0.439892	-0.134454	-0.937041	-0.362346	0.124171	-0.0522719	0.0763972	-0.131695	0.0426373	-0.0359169	-0.0363511	0.00146363	0.00743798	-0.0110474	PAS
-0.116604	-0.438724	-0.882658	0.483449	0.877523	-0.789228	-0.852493	-0.0921948	-0.157682	-0.00898675	0.0298639	-0.110017	-0.147301	-0.0218105	-0.0320982	0.0361332	0.0115382	0.00323082	0.0149975	PAS
-4.57832	-2.04468	-1.36436	0.58469	-1.0384	-0.758077	0.284355	-0.207607	-0.493543	-0.0632095	-0.157681	0.137714	0.0691552	-0.0416961	-0.107494	-0.0644337	-0.0184499	-0.033211	-0.018793	PAS
-0.316191	-0.386281	0.213082	-0.0673265	0.551473	-0.435173	0.115082	-0.519811	-0.213621	0.0133178	-0.0945599	-0.0795444	-0.0693858	-0.049894	-0.047459	0.0157932	0.0357679	0.0169574	-0.00126037	PAS
-2.32169	-2.07408	-2.60156	-0.184002	-0.456272	-0.811397	0.540119	0.467358	-0.00310695	0.105055	-0.00876728	0.0216933	0.117583	0.0635365	-0.0196532	0.0866296	0.017739	0.0290191	0.00682862	PAS
-1.92367	0.219356	1.6984	0.30793	0.885229	0.0597473	0.323458	-0.261473	0.140525	0.199981	-0.20264	-0.0426538	0.0158048	0.0452768	-0.05602	0.0133508	0.0531964	-0.00730269	-0.0158219	PAS
3.34378	-0.304968	1.60147	-1.64058	0.227624	-1.2678	0.171228	0.148112	-0.27404	0.0970612	-0.0678951	0.0663474	0.0581197	-0.0237135	0.045063	0.12607	0.0404976	-0.00391	0.0102316	PAS
-1.84003	-0.429849	3.31081	0.553136	-1.17891	-0.232248	0.923645	-0.605235	-0.516751	0.18248	-0.0413148	-0.00546494	0.0536554	-0.0291217	-0.0609899	-0.105926	-0.00282939	0.0544416	-0.030055	PAS
-0.628937	-0.510059	0.105759	0.318526	1.02402	-0.210537	-0.480514	0.175999	0.0197911	0.164466	-0.0778161	0.0167332	-0.0285098	-0.0320919	0.0152973	-0.0631006	-0.00846311	0.0309947	0.00337935	PAS
3.6427	0.334836	0.0861883	1.77554	0.503518	0.39478	0.991549	-0.0332964	0.182359	0.0549164	-0.0301848	0.074377	0.0144398	0.020659	0.00301902	-0.0419312	0.0129189	-0.00803188	0.0187227	PAS
-3.64553	-2.12275	-3.09509	0.342795	-0.565995	-0.998299	-0.358178	-0.254193	0.0151954	0.168149	0.0277513	0.0545395	0.0987756	0.0396646	0.0213571	0.135234	0.0157725	0.0102557	0.0077164	PAS
-0.603973	-0.463384	0.00561653	0.31624	0.987149	-0.345562	-0.560833	0.162346	-0.0591155	0.177776	-0.0906048	-0.0176589	-0.0262543	-0.0117699	0.0246596	-0.0609047	0.00741474	0.0196938	0.000200445	PAS
-0.336576	-0.138745	1.14022	0.398528	0.218508	-0.357233	0.355654	-0.39775	-0.364373	0.25198	-0.21709	0.0907877	0.0017012	-0.0441543	-0.0257868	-0.0666644	0.0139595	0.0489106	-0.0197749	PAS
-2.28759	-2.39728	-2.72835	-0.463316	-0.728853	-0.728841	0.949512	0.738563	-0.0136201	0.125385	-0.0234198	0.0315612	0.130079	0.0948824	-0.0272717	0.0647811	0.0114432	0.0312271	0.00428241	PAS
2.26478	-1.6655	-0.0247406	0.0941959	-0.156457	0.681682	1.36244	0.0720347	-0.250296	-0.0868174	0.0391538	-0.102617	-0.162082	-0.0235451	0.00942795	-0.0267107	0.0347793	0.00522959	-0.00912463	PAS
0.495456	-2.54376	-0.139045	-0.545612	0.302025	1.18933	0.759142	-0.0908232	0.259149	-0.0303865	0.0237042	-0.00647996	-0.0621632	0.0344634	0.0122985	0.0526343	0.0297583	0.0285612	-0.0117483	PAS
0.128994	-0.349507	-0.241442	0.380313	1.04542	-0.393262	-0.6499	0.0947935	-0.105731	0.0732646	-0.036244	0.0920845	0.0176646	0.00899102	-0.00124919	-0.119334	-0.0213566	0.0148513	0.00616536	PAS
-2.72629	-2.0325	-2.59171	0.173714	-0.490577	-0.99526	-0.611862	-0.184888	0.0907906	0.0574526	0.0597671	0.0405958	0.170424	0.110336	0.00928582	0.0536052	0.0329744	-0.0114575	0.00594139	PAS
0.66541	-0.89238	-0.368183	-0.150129	0.361436	-0.617154	-0.707768	-0.539955	-0.18355	-0.0612673	0.0774979	-0.157042	-0.107928	-0.0148896	-0.037029	0.0207308	0.0140912	0.00975824	0.0138193	PAS
4.99348	1.63844	0.262012	1.76089	0.920093	-0.69246	-0.158801	-0.403298	0.156816	0.169532	0.0136156	0.116106	-0.0189444	0.0642538	-0.0446761	0.132022	0.0177395	-0.0129771	0.032694	PAS
-2.90383	-1.25122	-1.99358	0.395499	0.0137921	-0.874	-0.550411	-0.033239	0.112063	0.0104364	-0.0218106	-0.00800694	0.246988	0.0930979	-0.0391526	0.00940007	0.0445183	-0.0185591	0.00907928	PAS
0.49068	-2.23473	-0.297721	-1.34513	-0.323031	-0.130891	0.712473	-0.328741	-0.391816	0.0467581	-0.0112704	0.0152742	-0.0544205	0.0557404	-0.0406766	-0.0394894	0.0137765	-0.000765777	-0.0143411	PAS
3.0201	-0.461773	-0.222748	0.525606	0.394679	0.199571	1.07876	0.461801	-0.150061	-0.11607	0.0494958	-0.00464538	-0.0606112	-0.0516483	0.00762086	0.0406023	0.00967471	0.000233058	0.0164091	PAS
1.413	-0.233849	-0.555887	0.0842159	0.865501	-0.589089	-0.772186	-0.488087	-0.257021	-0.223632	0.135314	-0.101203	-0.0085927	-0.0564448	-0.123778	0.00747823	-0.0379552	0.0060261	0.0406385	PAS
0.959844	-1.99456	1.34397	0.699363	0.304585	1.09027	-0.508124	-0.487825	-0.160102	0.299972	-0.00105569	0.11345	0.0028575	0.00285879	-0.0545966	0.108216	-0.0107722	-0.077427	-0.005201	PAS
-6.62937	0.661589	2.19579	1.26045	-0.499487	-0.554009	0.410468	-0.248144	-0.337836	0.0823065	0.600861	0.01172	-0.112917	0.180409	0.0764429	0.0509025	0.0434594	0.00463513	-0.0385453	PAS
0.485711	-1.44027	-0.791595	-0.73282	0.554211	-0.167156	0.0626554	0.152182	-0.0397349	0.177198	0.0268118	-0.0903639	0.0347146	-0.014539	0.109234	-0.0373247	0.00313736	0.0364667	0.0140964	PAS
1.38453	-0.887863	-0.418012	-0.194105	0.444214	-0.602304	-0.934807	-0.534093	-0.198547	-0.135407	0.153019	-0.138026	-0.0361499	-0.0226102	-0.0269559	-0.00578032	-0.00853149	0.00604573	0.0261811	PAS
-1.27801	-1.17889	-0.218492	0.178975	0.290082	-0.209805	-0.449448	0.188429	0.142852	-0.0550705	0.00839931	-0.057945	-0.137899	-0.0706648	-0.0537927	0.000810618	-0.0191242	0.00727427	0.0111157	PAS
3.18837	-0.467893	0.266683	-0.182343	0.592288	-0.0459228	0.513929	-0.127858	-0.312398	-0.075979	-0.00718123	0.0572848	-0.0852558	0.0183603	0.0443128	-0.0346174	0.0370838	0.00801881	-0.00968767	PAS
-0.939087	-0.599283	1.44278	0.0131281	1.1365	0.378608	-0.476424	0.261114	0.223243	0.144875	-0.157246	-0.137928	-0.0489674	0.000170656	-0.00131302	0.013316	0.0282677	-0.0265043	-0.0013163	PAS
-3.16938	-0.979803	-1.85948	0.649079	0.0224245	-0.8801	-0.508646	0.198735	0.101225	-0.049154	-0.0380947	0.0282243	0.257426	0.0542789	-0.0365475	0.0388541	0.0511257	-0.0255236	0.00815339	PAS
5.83116	3.07053	-0.717403	3.7496	0.441584	-1.17943	0.776908	0.962786	0.412191	0.26662	0.0200437	0.0967109	-0.1072	0.109787	-0.107408	0.11817	-0.00541904	0.00845571	0.0454158	PAS
-2.25313	-1.55156	-2.0282	0.343876	-0.214308	-0.822937	-0.676872	-0.0506977	0.107009	-0.0700247	0.062518	0.0982159	0.200362	0.0856804	-0.0448138	0.0203381	0.0151364	-0.0134511	0.0108219	PAS
-6.20099	1.84705	2.01147	0.545097	0.383057	-0.43309	0.968976	-1.08571	-0.217606	0.249339	0.892077	0.0428064	-0.0769333	0.115774	-0.0112875	-0.0407408	0.0836558	0.0500212	-0.0314337	PAS
-6.37379	-1.28553	0.0672083	0.992528	-0.246544	0.00288149	0.0457709	0.341178	0.0640688	-0.0411064	-0.144698	0.17802	-0.0608735	0.0369629	-0.0812679	0.00395357	-0.0108485	-0.0172887	-0.0292691	PAS
2.86741	-0.754303	1.71363	-1.80234	-0.118228	-0.945763	0.239897	0.0572838	-0.238694	0.110367	-0.0442327	0.0759206	0.109905	-0.0354768	0.018472	0.0963765	0.0145914	-0.0132494	0.0129129	PAS
4.74162	1.37517	0.065695	1.78793	0.987933	0.167667	0.858696	-0.0604933	-0.00919941	-0.037087	0.0474736	0.0327591	0.0206356	-0.0629551	-0.000801232	0.10243	0.0187793	-0.0311834	0.0344148	PAS
5.08296	1.20306	0.290522	0.980261	0.15158	-1.36704	0.19018	0.756961	-0.21152	0.0130986	0.0340241	0.00840701	-0.00228055	0.0339659	-0.0570542	-0.0681131	-0.0138423	-0.00289822	0.0297559	PAS
5.39646	1.08503	0.543379	1.36545	-0.629093	-1.91665	-0.255097	0.909521	-0.168885	0.0783274	0.101359	-0.012743	-0.0803281	0.0099659	-0.0961886	-0.0596802	-0.0517603	0.00209932	0.0410111	PAS
-5.75758	-0.0483729	-1.31826	1.70634	0.873796	-0.646814	-0.891641	1.29762	0.267248	-0.103836	-0.0594043	0.0474299	0.0562285	-0.0567582	0.0403064	0.0932806	0.0554602	-0.125339	0.00487082	PAS
3.10991	-0.13696	-0.306891	1.70391	0.182763	0.873161	1.51411	-0.00601793	0.17107	0.0540325	-0.0140134	-0.00950142	-0.0136569	0.0111951	0.0210953	-0.0377519	0.0219314	-0.0255319	0.0115316	PAS
-3.21033	-3.1098	-2.1992	0.243797	-1.98718	-0.917078	0.0946625	-0.359928	-0.682504	0.117015	-0.0541543	0.0661355	0.0611992	-0.00703021	-0.033673	-0.0602863	-0.0309037	-0.0513951	-0.0042144	PAS
5.64521	1.20509	0.576281	1.63581	-0.815654	-2.05206	-0.252864	1.10405	-0.102468	0.166328	0.0815323	-0.0292813	-0.101602	0.0568291	-0.128256	-0.0467396	-0.0480004	-0.000639273	0.0389575	PAS
-0.700934	-1.91506	0.388415	-0.294668	0.0408014	0.19675	-0.383177	-0.0730866	0.112336	0.25142	-0.0263976	0.0804283	-0.141011	-0.00581978	0.0258245	0.00102703	-0.0177334	0.00988279	-0.00958793	PAS
0.776127	0.475417	-0.333713	-1.73948	1.39702	-1.32142	-0.0756483	0.30493	-0.139672	0.0581297	-0.0916866	0.0160849	0.125387	0.023584	-0.0370639	-0.0141085	-0.00390286	0.0137428	0.0268509	PAS
0.831346	-0.496816	-0.975698	0.279481	0.739657	-0.758769	-1.33893	-0.393569	-0.173367	-0.110302	0.13802	-0.0363981	-0.129764	-0.00588844	-0.0173453	0.00616904	-0.022076	0.0151839	0.0184538	PAS
-5.07989	-1.5709	-0.744924	0.825858	-0.954582	-0.513981	0.226456	0.0350756	-0.441699	0.00838682	-0.176678	0.0875573	0.0360332	-0.0689027	-0.103261	-0.0481195	-0.0166504	-0.037384	-0.0114024	PAS
0.729157	-0.16899	0.365184	0.103404	0.538905	-0.34466	-0.187699	-0.336137	-0.294922	-0.0629316	-0.0518636	0.0304836	-0.0367439	-0.0415964	-0.0732455	0.0159207	0.0120487	0.00641343	0.000478542	PAS
0.515875	-1.45372	-0.86449	-0.0344678	1.04013	0.152334	-0.803178	1.39126	0.437516	-0.219887	0.138582	-0.0505571	-0.0623651	0.00895548	0.0215083	-0.0333771	-0.0329057	0.0230895	0.0225278	PAS
-1.03265	-1.61614	0.346124	-0.297866	0.256221	0.167764	-0.389047	-0.0677046	0.064491	0.252355	-0.0523463	0.0231469	-0.184966	0.0091417	0.00604261	-0.0479318	-0.0106358	0.0165778	-0.0137486	PAS
1.23213	-0.593863	-0.884153	0.184456	0.492728	-0.584642	-0.445869	0.367094	-0.287413	-0.174184	0.094452	-0.00141529	-0.0305273	-0.01718	-0.0487644	-0.0434069	-0.0276599	0.0285609	0.0155755	PAS
2.63874	-0.31451	-0.238794	-0.517039	0.669646	-0.206317	0.464698	-0.398064	-0.522553	-0.0921346	0.0337646	0.0492053	-0.0915864	-0.0324314	-0.0324642	0.0205979	-0.00352989	0.0187494	0.00364395	PAS
-1.34169	-0.970018	0.667753	0.155348	0.512924	0.107979	-0.432977	0.236749	0.0674934	0.226549	-0.0827162	-0.00563489	-0.159178	-0.0188702	0.00441837	-0.0479549	0.00187722	0.0171172	-0.0133089	PAS
-2.08126	-1.74289	-2.02504	0.175594	-0.328594	-0.722052	-0.772264	-0.181336	0.123828	-0.0577793	0.0681725	0.116175	0.195432	0.118089	-0.0518791	0.0169064	0.0104963	-0.015112	0.00928316	PAS
1.4657	-0.786251	-0.0501431	-0.318097	0.428892	-0.817568	-1.05549	0.355076	-0.102494	-0.024731	0.0804437	0.0183468	-0.103125	0.0263997	-0.0296448	0.0117003	-0.0233143	0.0166066	0.0103283	PAS
4.5149	0.978095	0.0134463	1.84145	0.962132	0.574784	1.02995	0.172573	0.109654	0.165563	-0.00225543	0.0765184	-0.014338	0.0400914	-0.00558673	0.111145	0.0222536	-0.019847	0.0142147	PAS
0.118521	-0.449529	0.166383	0.193703	1.02274	0.0281053	-0.549039	0.0458271	-0.0660846	0.0295951	-0.0729372	0.163178	-0.0781823	0.0146266	0.00160559	-0.0281315	0.00441008	0.0200437	-0.0154773	PAS
1.62858	-0.307198	-0.549444	0.160086	0.50175	-0.716723	-1.04049	-0.442009	-0.25707	-0.149103	0.143396	-0.0769051	-0.0724862	-0.0532551	-0.0387025	0.00544532	-0.0310639	0.0125736	0.0273143	PAS
1.28006	-0.552817	-0.918317	0.0260065	0.034463	-0.751637	-0.0482558	-0.0952384	-0.498882	-0.00299099	0.0574931	-0.0756528	-0.123422	-0.0356668	-0.0818786	0.0180275	-0.0221427	0.0182614	0.0142834	PAS
-1.60473	-1.95641	-2.16643	-0.22227	-0.449636	-0.499072	0.213358	0.390148	0.0227937	0.0850669	0.00654651	0.0477196	0.0944683	0.0922837	0.00481653	0.0687757	0.0314465	0.0276414	-0.00232103	PAS
1.16583	-0.454281	-0.977599	-0.686291	0.992951	-0.417441	-0.560568	-0.297507	0.0845501	-0.0987143	0.083352	-0.0132167	0.0923939	-0.00956965	0.022319	-0.0106402	-0.0306251	0.000888594	0.0364098	PAS
1.52096	-1.77363	-0.478995	-1.17812	-0.308314	-0.108235	0.915928	-0.0404155	-0.499723	0.126622	0.00134945	0.039242	-0.108027	0.0602069	-0.0453163	0.0260621	0.00145488	0.00597357	-0.0114971	PAS
2.02577	-0.994404	-0.210382	-0.282249	-0.118795	-0.0678364	0.542846	-0.268508	-0.548063	-0.0773944	0.0607762	-0.102664	-0.0821081	-0.0422672	-0.109967	0.0567724	0.00206706	0.00369298	0.00764968	PAS
2.57284	-0.899303	-0.932497	0.73143	0.175888	1.13591	2.02874	0.637921	0.147989	0.10784	0.0102611	-0.21574	0.0712436	0.0921704	0.0883439	-0.126522	0.0549587	-0.0207528	0.00371502	PAS
0.836564	-0.125217	-0.559196	0.137814	1.95439	0.170854	-1.28619	0.408065	0.254306	-0.132289	0.128793	-0.00661184	-0.0526488	-0.051874	-0.0529593	0.00527138	-0.0740532	0.0106489	0.0395173	PAS
-7.72756	-1.09633	1.34895	1.36903	-2.22669	0.0205674	0.75118	-0.614223	0.188033	-0.216186	0.664755	0.0532463	-0.186821	-0.127149	0.0332718	0.00741326	-0.0560109	-0.00472998	0.0141953	PAS
-5.2734	0.112291	-0.138087	0.50288	1.2419	0.111073	-0.40186	0.489242	0.439348	0.0151166	-0.00869931	-0.227304	-0.0981678	-0.0731976	-0.0194966	0.00949335	0.0028379	8.05834e-05	0.0209132	PAS
-4.29324	-0.658648	-2.34341	0.855447	0.120274	-0.893418	-0.486863	0.362134	-0.157535	-0.0853289	-0.0336813	-0.0256676	0.0561005	-0.0563892	-0.0185407	0.0381289	0.0403744	-0.0836047	0.0110672	PAS
0.57302	-0.937242	-0.375624	-0.841273	0.748629	-0.52687	-0.805497	0.226239	-0.105044	0.041191	0.0383249	0.0715698	-0.0161778	0.0540262	-0.00803474	-0.0820327	-0.0333664	0.0147647	0.00666047	PAS
-0.709767	-0.0534557	2.30146	-0.569034	1.19935	-0.23012	-0.970224	1.63877	0.486354	0.1359	-0.0970075	-0.18067	0.00548543	0.0341176	0.0384947	-0.0590023	0.0017914	0.00532299	0.0117133	PAS
1.46002	-0.816237	-0.852677	-0.0841707	0.771508	0.467068	0.337432	0.524249	-0.0575624	-0.411338	0.159324	-0.170622	0.0557041	-0.0823979	-0.0930576	-0.000266394	-0.0182075	0.00336312	0.0339943	PAS
3.56302	0.0701746	-0.04159	0.0375339	0.772412	0.180853	0.727317	0.320113	-0.184098	-0.00602118	0.0193539	-0.0449767	0.0198896	-0.0169167	0.0187066	0.0128036	0.00726502	-0.00113246	0.0131939	PAS
0.702212	-0.885644	4.75656	-0.917095	-1.91387	-0.453347	0.511649	0.295192	-0.0706713	0.037242	0.202335	-0.0651866	0.0750806	-0.107785	-0.100557	0.0484805	-0.0267029	0.0302381	0.018161	PAS
0.947793	-2.09776	-0.925613	-1.61724	0.231836	0.102052	0.699192	1.53516	0.101271	0.0744906	0.09207	-0.230093	0.0698106	0.0382183	0.0771361	-0.00849357	0.0159263	0.00491955	0.0187592	PAS
3.25331	-0.0797525	-0.32431	0.299602	0.744777	0.584125	1.16653	0.493561	-0.092119	-0.0328306	0.0145873	-0.19324	0.0254136	-0.0208305	0.0631407	-0.00544122	0.0498911	-0.00435084	0.00846409	PAS
3.55639	0.206798	-0.0997246	0.349356	0.577755	0.0701822	0.773475	0.468965	-0.0722366	-0.00430287	-0.00787922	-0.0555195	0.0399024	-0.00134955	0.0587654	-0.0421325	0.0225871	0.00320918	0.00854149	PAS
-2.53869	-1.12591	-2.06612	0.399662	-0.110547	-0.742278	-0.679553	-0.00662695	0.0368607	-0.00791729	0.00305897	0.0329232	0.16737	0.0740309	-0.0117534	0.0662516	0.0531418	-0.0082211	0.00256428	PAS
3.81321	0.06047	-0.075497	-0.320566	0.848039	0.0763866	0.667666	0.0319969	-0.392162	-0.068803	0.0411953	0.115485	0.0132824	-0.0183961	0.0610638	-0.0268295	-0.0100132	-0.0133793	0.00451659	PAS
-5.74916	-1.02495	0.0284358	1.13163	-0.165334	-0.0206326	-0.341807	0.685165	-0.0194831	0.0430694	-0.162924	0.0665129	-0.0521291	0.0270844	-0.0486409	-0.00576798	0.00970395	-0.0220073	-0.0184194	PAS
-1.97457	-1.78836	-2.35414	0.0883461	-0.399076	-0.760174	-1.08654	-0.375188	0.0615862	-0.00186506	0.120994	0.062226	0.158295	0.0990397	-0.00337432	0.0274277	0.0034161	-0.00265335	0.0147446	PAS
0.762592	0.397955	1.96528	-1.9168	1.01758	-0.451831	0.351635	0.0416969	-0.243295	0.0273952	-0.175091	0.0775945	0.0327062	-0.0532162	0.0397465	0.0157295	0.0327005	0.0211458	-0.00902294	PAS
-5.90942	-0.338271	-1.63103	1.47094	0.29579	-0.475107	-0.502728	0.791802	-0.0162	-0.0218028	-0.0639306	0.0783838	-0.0626075	-0.192111	0.0768556	0.0483682	0.0102817	-0.020574	0.0047225	PAS
-0.475219	1.02511	0.355223	0.937967	1.42951	-0.149393	-0.440887	0.460608	-0.108439	0.115964	-0.153554	0.0942432	0.023976	-0.0877358	0.00324674	-0.020446	0.00210051	0.0314943	-0.00190247	PAS
0.389406	-3.38449	2.99221	-2.49432	-1.61882	0.0287874	0.0595052	1.00799	0.315758	0.285456	0.0118875	0.130082	0.00583793	-0.105333	0.117185	0.0311961	-0.0557085	-0.0219963	0.0141318	PAS
3.26331	0.0847069	-0.516667	0.529503	0.511112	0.606025	1.42579	0.507051	-0.0364136	-0.00426251	0.0108135	-0.244863	0.0767918	0.00096184	0.0622577	-0.0611999	0.0568918	-0.016146	0.00902919	PAS
0.10367	-1.14582	0.535324	-1.72379	0.827748	0.000626474	-0.563761	0.257025	0.202496	-0.0544578	-0.0221213	-0.122244	-0.0176773	-0.0215334	0.0836785	-0.0368761	0.0123971	0.0163383	0.00919173	PAS
3.15559	-0.152704	-0.50696	0.148982	0.45476	0.459309	1.14945	0.364785	-0.237959	-0.0728226	0.0710174	-0.118244	-0.00283036	-0.0852883	0.0689293	-0.0479805	-0.00531717	-0.00431804	0.0154406	PAS
0.789894	-0.138965	-0.0249826	0.176258	1.03597	0.00529901	-0.772367	0.139181	-0.127898	0.00456698	0.000255114	0.0563466	-0.0384257	-0.042593	0.000799706	-0.0120714	-0.0208761	0.019646	0.00344606	PAS
0.610721	-1.40304	0.0952361	-1.17558	0.545126	0.0670728	-0.881681	-0.325661	-0.00147843	-0.0179517	0.0312343	-0.109067	0.00281477	0.0482947	0.0283677	-0.0470799	0.0088752	-0.0130286	0.00648331	PAS
1.05359	-0.527411	-1.04059	-0.648574	0.50096	-0.66996	-1.09008	-0.557855	0.265577	0.0973884	0.0855446	-0.0300416	0.187964	0.122476	0.00281188	-0.0780744	-0.0285533	0.010262	0.0317202	PAS
3.2985	-0.929068	0.437223	-0.715076	0.0953254	0.13912	0.169475	-0.448553	-0.468292	-0.0436071	0.0715105	0.169161	-0.0390083	0.0280727	-0.0488913	-0.0326377	-0.0386684	-0.0121011	-0.0040316	PAS
4.03401	0.402918	0.0174495	0.514994	0.370479	-0.0520825	0.614119	0.643222	-0.0830491	0.0545206	0.0199283	-0.0701075	0.0746677	0.0341596	-0.0119077	-0.0701045	-0.00704667	-0.00572546	0.0134424	PAS
-1.45088	-1.02661	-1.44493	0.336379	0.0546295	-0.430466	-0.734091	0.19999	-0.0787098	-0.158223	0.0454294	0.124312	0.0541407	0.0553431	-0.0721233	0.0102606	0.0116857	-0.0514478	0.00156406	PAS
2.54087	-0.609928	-0.0619809	-0.350837	0.257878	-0.491724	-0.8896	0.0745722	-0.197434	-0.0581142	0.14419	-0.0566386	-0.104473	-0.0170976	-0.0132296	0.0472621	-0.0259802	0.0115847	0.0142739	PAS
0.838274	-0.756699	0.0841978	-0.00169704	0.602269	0.0958224	-0.766139	-0.00815028	-0.106481	-0.00946667	0.00847927	0.160594	-0.135133	0.0144199	-0.012524	0.00437711	-0.0167434	0.0229473	-0.0135073	PAS
0.776813	-0.437644	-0.0976721	0.152313	0.72641	-0.0537078	-0.816354	0.111575	-0.129951	0.0177058	0.0167634	0.101105	-0.083344	-0.0157779	-0.00178811	-0.0136194	-0.0238038	0.0154656	-0.00239544	PAS
1.13142	-1.02686	-0.904007	0.24285	0.309712	0.489355	0.352944	0.662294	-0.0656422	-0.198155	0.0852512	-0.0572076	-0.171364	-0.0486938	-0.0447109	0.0395072	-0.0140343	0.0336591	0.00211046	PAS
3.51305	-0.849656	0.615839	-0.176145	-0.383974	-0.0128744	0.232387	-0.0729441	-0.423211	0.0536957	0.062072	0.0248428	-0.161341	-0.0033301	-0.0569428	0.003521	-0.0273416	-0.0176	-0.00256595	PAS
2.64165	-0.494206	-0.184434	-0.163577	0.0435829	-0.108458	0.32754	0.123252	-0.393987	-0.094389	0.0589306	0.0184185	-0.0955095	-0.0585494	-0.00193133	0.0277759	-0.0122782	0.011005	0.00113351	PAS
1.582	-0.59368	-0.923803	0.267821	0.483901	0.262632	0.19491	0.754768	-0.16577	-0.302685	0.119813	-0.0677919	-0.0567595	-0.0514258	-0.0856452	-0.00019957	-0.0293184	0.0267921	0.0130476	PAS
2.81972	-0.753964	-0.345054	0.435717	-0.0625258	0.889678	1.49075	0.441655	-0.0561446	0.0784415	-0.0070894	-0.136075	-0.0550272	0.00485055	0.0983579	-0.0534148	0.0431436	-0.0346273	-0.00737199	PAS
-0.174053	0.0871256	-0.272165	-1.6927	-0.000120868	-1.11114	0.346031	-0.347494	0.106091	0.00335822	-0.124252	-0.13025	-0.000603905	-0.0135858	0.0541026	-0.0117858	0.0558412	0.00696807	0.010007	PAS
2.6955	0.0808827	-0.31826	0.157798	0.633	-0.374827	-0.811865	0.142824	-0.236795	-0.250833	0.162653	-0.0104927	-0.0889064	-0.0354474	-0.112044	0.0719834	-0.0430228	-0.00277748	0.0193747	PAS
3.064	-0.0246815	-0.673822	0.310469	0.405265	0.329183	0.955408	0.588549	-0.176623	-0.107981	0.0833004	-0.0168789	-0.0279125	-0.0908592	0.078178	-0.0609418	-0.0344813	0.0121231	0.0129814	PAS
5.85109	3.52951	-0.774383	3.61504	0.407169	-1.06504	0.509512	0.913092	0.354083	0.25125	0.0144797	0.0491414	-0.0691707	0.115215	-0.124804	0.103201	-0.0145908	-0.00192778	0.0163685	PAS
-2.51049	0.317649	2.30206	0.347486	-0.154722	0.246286	0.40883	-0.258162	0.00562454	0.244146	-0.089183	-0.0144493	-0.0133164	0.00486981	-0.0114328	-0.00517916	0.0371612	0.017247	-0.0107132	PAS
3.01596	0.263103	-0.49365	0.0266498	0.358276	-0.34127	0.234841	0.292937	-0.424816	-0.199316	0.0868771	-0.0473083	-0.010376	-0.0687179	-0.0463607	0.0270001	-0.0190494	-0.00109269	0.0138814	PAS
-3.54177	0.517874	1.05843	1.71285	0.436786	-0.168778	-0.840694	1.24617	0.0622874	0.352443	-0.0837996	0.0617452	0.021931	-0.0746732	0.0980366	-0.0868276	-0.00467675	0.0165167	-0.00327246	PAS
1.17205	-1.06655	-0.110725	-0.914333	0.088396	-0.390551	-0.673487	-0.107208	-0.271382	0.0783405	0.0340246	0.11578	-0.122829	0.0437362	-0.0259613	0.00286481	-0.0302901	0.0267682	-0.00734912	PAS
1.85199	0.634876	1.77593	-1.52817	0.458715	-0.941194	-0.0368145	0.587145	-0.1241	-0.0635046	-0.122734	0.0332598	-0.0873774	-0.0559218	0.0299619	0.084862	0.0441063	0.0193806	-0.0103944	PAS
2.77429	-0.212439	-0.492857	-0.885596	0.714401	0.0652442	0.514586	0.234567	-0.415926	-0.0612298	0.066911	-0.0885973	0.04332	-0.0347535	-0.011083	-0.0054336	-0.0171752	0.00678893	0.0122413	PAS
3.87408	0.904609	-0.502993	2.06628	0.3047	0.709454	1.25731	0.319922	-0.0306847	-0.0168066	-0.0199834	0.0895399	-0.00972854	0.00874568	0.0504501	-0.063125	0.00640638	0.00869859	-0.013184	PAS
1.47716	-0.67627	-0.853345	-0.11063	0.597454	0.373266	0.0976724	0.516845	-0.146724	-0.165979	0.0832172	-0.0636534	-0.0468873	-0.0312331	-0.0417005	0.00560526	-0.0231169	0.0295733	0.0075282	PAS
-5.16422	0.29349	0.412773	0.658353	0.703954	0.206155	-0.329547	0.416335	0.26125	0.0415489	-0.0196802	-0.0760198	-0.133353	-0.0194237	-0.00560487	0.0231785	0.0227905	0.00333069	0.00263731	PAS
4.45548	1.8428	-0.294794	2.87745	-0.421884	-0.489366	0.549674	0.499092	0.280226	0.18457	-0.033805	-0.00317053	-0.0617162	0.0088465	0.0188913	-0.038649	-0.0044084	0.0367271	0.00252769	PAS
-7.20197	2.14275	1.4604	1.00792	-0.0483757	-0.55297	1.00196	-0.996612	-0.691383	-0.181047	-0.31624	-0.0178876	-0.0204417	0.253008	0.0515189	0.0598213	-0.126002	0.041593	0.0222885	PAS
-0.789464	-2.02121	-1.75649	-0.389344	0.367831	0.38611	-0.32188	1.61489	0.566738	-0.0829532	0.0589564	0.208591	0.0755168	0.180049	0.020137	0.0210859	-0.00229721	0.020359	-0.00767374	PAS
-2.79283	-3.09609	-2.29815	-0.121987	-2.31456	-0.503342	0.830182	0.266451	-0.749839	0.148788	-0.120102	0.17088	0.0304267	0.0233717	-0.039629	-0.0478568	-0.0198077	-0.0411522	-0.00778509	PAS
4.02659	1.10882	-0.121208	2.36276	-0.370261	0.0966972	0.766817	0.359156	0.0902403	0.000976654	-0.0238044	-0.00992604	-0.0085934	-0.0194439	0.00591937	-0.0792828	-0.000891007	0.00570965	-0.000331673	PAS
-1.70597	1.53213	0.809512	1.14383	0.850417	-0.256087	-0.108779	0.323689	-0.293919	0.275683	-0.178383	0.0472214	0.0994108	-0.140969	0.00938251	-0.0414774	0.000334054	0.0347485	0.00185274	PAS
-5.43859	2.59623	2.65588	1.40569	0.231746	-0.401669	0.528726	-0.356662	-0.326762	-0.0304137	-0.464709	-0.182579	0.0305252	0.195814	0.169387	0.154786	-0.133901	0.00322	0.046455	PAS
2.66115	-0.152773	-0.00835559	-0.565074	0.765725	-0.325395	-0.922828	0.284604	-0.0779966	-0.0770451	0.0782167	0.0463938	-0.0831741	0.0292151	0.0181109	0.0634342	-0.00832319	0.00393623	-0.00191775	PAS
1.84865	0.530111	-0.109571	0.186247	1.034	-0.217314	-0.770856	-0.280044	-0.360516	0.144238	-0.0212206	0.126981	-0.0915687	-0.0362866	0.0331409	0.0685223	-0.0154422	0.0340022	-0.0105352	PAS
2.59948	-0.443511	-0.242928	-0.970767	0.573414	0.170494	0.272679	-0.447434	-0.61716	-0.0424294	0.0319144	0.0947636	-0.00387683	0.00202915	-0.0221993	-0.00593011	-0.018705	0.00300788	-0.00873039	PAS
2.64903	0.0939848	-0.584439	0.0495372	0.187073	-0.130688	0.337084	0.299196	-0.426736	-0.230213	0.100407	-0.137148	-0.0476463	-0.0816737	-0.0812237	0.0468276	-0.00940275	-0.00036239	0.0117694	PAS
4.29312	1.72467	-0.340143	1.24182	1.11619	0.197285	0.320285	-0.474098	-0.182919	-0.0364826	0.00526414	0.187918	0.0551747	-0.00541289	0.029579	-0.0675903	-0.0297311	-0.0178322	-0.00320444	PAS
3.42747	0.523917	-0.819545	-0.0199801	0.855174	0.138303	0.738942	0.514926	-0.179189	0.00385295	0.0507716	0.122928	0.0331935	-0.021569	0.0926259	-0.0614352	-0.0506834	0.00454206	0.00490056	PAS
4.28173	0.516372	0.805983	-0.724736	-0.331905	-1.27601	-0.429004	0.200521	-0.180165	0.0615083	0.0853164	0.0872384	0.0331955	-0.0238906	0.000138116	0.0823418	-0.0287386	-0.0186507	0.0174316	PAS
-6.75544	0.614646	2.09742	1.20299	-0.162467	0.16154	-0.238227	0.355486	-0.151765	-0.0291793	0.624045	0.0968217	-0.116601	0.233826	0.0501884	-0.0150845	0.0472286	0.00664148	-0.024902	PAS
-0.0745068	-1.81966	-1.62829	-0.756361	0.281655	0.253989	-0.0144135	1.84306	0.42104	0.00333098	0.0917731	0.00768628	0.0881128	0.125431	-0.00366964	0.0381019	-0.0164669	0.0245651	0.0102073	PAS
-1.42066	-0.843677	-1.16743	0.208227	0.061587	-0.117149	-0.672104	0.137331	0.133825	-0.106012	0.00552602	0.195893	0.1936	0.0756057	-0.0675447	-0.012529	0.0026899	0.0050848	0.00276863	PAS
-1.08679	-3.66226	-1.42563	0.369972	-1.19219	2.17656	1.47561	0.9925	0.393947	-0.274895	0.10919	-0.279977	-0.150314	-0.00976798	-0.000779495	-0.000730084	0.0460809	0.0231538	-0.00497835	PAS
3.95904	1.01871	-0.688079	2.21951	0.171655	0.689361	1.25789	0.411392	0.101225	0.216196	-0.0272755	0.115328	-0.03503	0.0685527	0.0138474	-0.0534707	-0.0326847	0.00574973	-0.0102844	PAS
4.34289	-0.0205321	0.448211	-0.467636	-0.201361	-0.643127	-0.609536	-0.11807	-0.209211	0.162396	0.19621	0.0636219	0.0253856	-0.0662701	-0.0124475	0.134667	-0.0870997	0.00144696	0.0339147	PAS
3.56139	0.502774	0.112253	0.494926	-0.289907	-0.488096	0.109719	0.511949	0.0318549	-0.0124548	-0.00730389	-0.150025	0.0443349	0.0252076	0.0180111	-0.0865759	0.0236226	-0.0112288	0.0034359	PAS
2.20122	0.485116	0.436624	-0.0629879	1.05923	0.0342134	-0.790475	-0.30148	-0.27068	0.010463	-0.0267537	0.054159	-0.0783728	-0.0167474	-0.00244337	0.0405884	-0.000615105	0.0141769	-0.0117946	PAS
0.754018	0.873924	1.19395	0.490743	1.42005	0.328454	-0.772536	0.468892	-0.0941947	0.0296557	-0.13302	0.072717	-0.0489706	-0.0480936	0.000350431	0.0403436	0.0189887	-0.00634819	-0.0159679	PAS
-0.629065	-1.29776	0.663264	-0.668087	0.274285	0.632564	-0.548376	-0.0726146	0.040481	0.185723	-0.0771273	-0.121584	-0.0752675	0.00776084	0.0108179	0.00522851	0.0238357	-0.0201728	-0.00156146	PAS
-5.96676	0.623399	0.456472	1.76208	0.215794	0.355768	-0.0793169	-0.0142644	-0.323312	0.0694471	-0.0893649	-0.0738942	-0.029813	-0.00453862	-0.0801708	0.0562505	0.0319588	-0.016246	-0.0013295	PAS
3.13154	0.445387	-0.878075	1.3764	0.771344	1.56915	1.68791	0.0737736	0.0759139	0.160805	-0.0466745	-0.10142	0.0783018	0.0906183	0.0190807	-0.071313	0.0293279	-0.0117508	-0.0137001	PAS
-0.646692	0.236512	-0.34354	-2.51672	0.599499	-1.32827	0.0244543	0.551888	-0.117409	0.0704624	-0.115126	-0.064786	0.0341327	0.0140803	0.0125607	-0.0425431	0.0167153	0.0392375	0.00711479	PAS
2.10347	0.0133452	-0.894972	-0.252922	0.408181	0.0219155	0.447797	0.0647356	-0.611302	-0.120817	0.0419155	-0.104009	-0.0240144	-0.0204495	-0.11275	0.00528711	-0.0115326	0.0342653	-0.00258985	PAS
-1.17896	-1.98073	-1.65823	0.0492925	0.43319	0.461327	-1.12949	1.34673	0.666122	0.013599	0.0616009	0.286914	0.0497044	0.115974	0.118857	0.029248	-0.0282175	0.0325837	-0.00368125	PAS
-1.71415	0.719791	0.0895797	-1.92114	0.884906	-0.599597	0.500484	-0.204318	-0.0309071	-0.0305776	-0.237985	-0.0426012	-0.0563187	0.0292736	0.0437921	-0.0473565	0.0750309	0.0359464	-0.0177269	PAS
1.99967	-0.319494	-0.817646	-0.266639	0.458547	-0.0479864	-0.157276	0.808828	-0.205755	-0.15032	0.113424	-0.0905653	-0.0822731	-0.0345346	-0.0504241	0.0416025	-0.0311043	0.0255725	0.0077853	PAS
-2.93394	-0.133043	1.5378	0.187551	-0.303203	0.370018	0.223996	-0.134865	0.0222806	0.156416	-0.088303	0.0236805	-0.0351305	-0.0438725	0.00369881	-0.0697325	0.0154062	0.0370881	-0.00395266	PAS
-4.84751	-0.189592	2.59234	1.34658	-1.02726	0.702444	0.141809	-0.215862	-0.300558	0.379623	0.317498	-0.0615726	0.256508	0.00558627	-0.0170139	-0.0143046	0.00949637	0.0402942	0.0177156	PAS
3.99986	1.38804	-0.288306	1.13391	0.909989	0.478091	0.485042	-0.39592	-0.191275	-0.0405772	-0.0260927	0.120311	0.0637613	-0.00424418	0.0398286	-0.079374	-0.0128824	-0.00818692	-0.012557	PAS
3.23815	0.514252	0.0162451	1.37601	-0.249473	0.245674	0.15207	-0.300069	0.0318835	-0.0599936	0.0150812	0.0614696	-0.0508532	-0.0549029	0.048043	-0.0607558	-0.0108772	-0.00125724	-0.0045439	PAS
3.31588	0.970265	0.676448	-1.13363	0.144132	-1.52503	-0.527143	0.367887	-0.363959	-0.0411735	-0.0563079	0.0597144	-0.0904182	0.0123611	0.0357076	0.08926	0.0388865	0.0260022	-0.0202059	PAS
3.54129	0.596323	-0.869765	0.19695	0.596406	0.300727	1.04153	0.553074	-0.150975	0.0749424	0.0187634	0.0395163	0.0497708	0.0140545	0.093269	-0.0753898	-0.0262737	-0.00588602	-0.00408503	PAS
3.84706	1.31438	-1.18642	0.742401	0.489373	-0.217552	0.955989	0.855501	0.0012487	0.0633969	0.0419164	0.0705486	0.0914268	0.0378454	0.0330668	-0.100386	-0.0598905	-0.0228428	0.0104286	PAS
1.24225	-0.259913	0.361326	-1.58629	0.502099	-0.355564	-0.479344	0.036737	-0.0975163	-0.0236682	-0.054242	-0.0871001	0.0121728	0.00922457	0.0625803	-0.0166392	0.0314433	0.0140211	-0.00329874	PAS
-6.05978	0.0920598	0.888007	1.86701	-0.90662	0.176192	0.0196979	0.0297386	-0.61651	0.278354	0.100078	-0.134638	0.32945	-0.123582	-0.0172994	0.0966746	0.0222577	0.0357615	0.0293369	PAS
3.87456	1.40211	-0.712792	1.52589	0.862237	0.789983	1.00687	-0.00879041	-0.0165876	0.0781169	-0.0210479	0.0294059	0.0725116	0.0302301	0.0136263	-0.0786646	-0.0187716	-0.0303698	-0.0053432	PAS
0.264894	0.512111	0.107135	0.256902	1.46136	0.425261	-0.930285	0.515701	0.0995895	-0.177606	0.0175809	0.0210344	0.00891546	-0.047603	-0.130103	0.013478	-0.0396115	-0.00196388	0.0126212	PAS
3.13932	0.610365	-0.969721	0.388081	0.401173	0.145487	0.745769	0.690038	-0.142045	-0.151627	0.1027	-0.0513229	0.079307	-0.0884101	0.0614981	-0.125248	-0.053428	0.0118405	0.0147801	PAS
0.56852	-1.15504	-1.06935	-0.646569	-0.0317484	0.178575	0.00416675	0.45698	-0.0608086	-0.0386162	0.0572418	0.0803641	0.12906	0.0586132	-0.0897014	0.0434746	-0.0295629	0.0204978	0.00906142	PAS
-0.942576	-0.610551	-1.14045	0.280524	0.133115	-0.159963	-0.834766	0.207062	-0.111452	-0.116877	-0.00931755	0.20266	0.020186	0.053006	-0.00549465	0.0138121	0.0225567	-0.0183446	-0.0159818	PAS
-0.470072	0.166552	-0.533936	-2.01141	0.856223	-0.591349	-0.092244	0.0184395	-0.106035	0.120897	-0.0927866	-0.113332	0.0299508	0.0146964	-0.00742059	-0.0285935	0.0136773	0.0281119	0.00740495	PAS
-2.07729	-2.00535	-1.28375	0.422895	-1.74128	-0.452183	-0.369124	-0.19658	-0.743026	0.0610129	-0.0829682	0.137589	0.0626304	-0.025266	-0.0294304	-0.072874	-0.0147114	-0.0646704	0.00194569	PAS
3.6663	1.27092	-1.31367	0.693835	0.473693	-0.124304	0.998536	0.863745	-0.0117717	0.0145105	0.0439767	0.0541562	0.0863601	0.0247525	0.0579867	-0.0968699	-0.0490478	-0.0137095	0.00381487	PAS
4.17662	2.84306	-1.30649	1.79985	1.0891	-0.436742	0.227398	-0.138647	0.0812524	0.0727914	-0.00152309	0.189369	0.0271924	0.00268804	0.0565478	-0.0760599	-0.0637985	0.0275215	-0.00414766	PAS
3.7531	0.462722	0.0763321	-0.808422	0.188659	-0.977157	-1.27818	-0.516646	-0.342814	-0.0221091	0.094349	0.0337931	-0.0264682	0.0499894	0.049138	0.0425256	-0.00606378	0.00456261	-0.00874178	PAS
-0.921707	-0.214325	-0.557005	0.176469	0.742244	0.340939	-0.87014	0.398082	0.149474	-0.25028	-0.0437854	0.148243	0.13865	0.0738023	-0.0583099	-0.0677765	0.0161194	-0.0210586	-0.0081735	PAS
-0.855139	-3.10381	-2.35207	-1.26939	-1.08027	0.326544	0.943103	2.26818	0.184663	0.192779	0.0889271	0.129506	0.0507155	0.124336	-0.00357719	0.0867976	-0.0885879	0.0484095	0.0190522	PAS
1.59941	-0.0873463	-0.0367569	-0.361734	0.890971	0.238977	-1.11926	-0.293823	-0.193842	0.120252	0.0113151	-0.0105052	-0.0403137	-0.0037337	0.0785804	0.0205078	-0.0037017	0.0197052	-0.010248	PAS
2.27639	0.222518	-0.978946	-0.52561	0.649464	0.228163	0.380048	0.122497	-0.455663	-0.179399	0.0402022	-0.0143504	-0.0794225	-0.0180198	-0.0585315	0.0479409	-0.0114406	0.0360397	-0.0160706	PAS
-1.98174	-2.61095	-1.65374	-0.330219	-1.88659	-0.175149	-0.119431	-0.343411	-0.61464	0.0233195	-0.0391444	0.107344	0.0417554	0.0348231	-0.0651515	-0.0514262	-0.00979748	-0.0168206	0.00179961	PAS
3.32358	1.06221	-0.247178	1.33009	-0.1206	0.18439	0.177477	-0.404994	0.0683913	0.100527	-0.0272744	-0.0705213	-0.0403721	-0.00677607	0.0309458	-0.0697536	0.00253219	-0.00998288	-0.00815646	PAS
0.336107	-0.557277	-1.50483	-1.41516	0.0679237	-0.239854	-0.566718	-1.33365	0.143167	-0.0438706	0.0879839	-0.0649915	-0.0300166	0.00777869	0.0696252	0.0225522	0.000132089	-0.0375198	0.0211969	PAS
-6.57827	-0.2003	1.22507	1.69942	-1.5684	0.276529	0.187631	-0.123907	-0.580775	0.349472	0.252257	-0.103988	0.260721	-0.0590026	-0.00231011	0.107158	0.0386684	0.0280239	0.0319516	PAS
-0.390303	0.134102	-0.109847	0.430422	0.618768	0.249987	-0.798498	0.549563	0.00380952	-0.262923	-0.0558878	0.203046	0.0314311	0.00558591	-0.0395483	0.00816367	0.0200404	-0.00980291	-0.0183882	PAS
3.28734	1.12271	-1.33186	0.229885	0.762266	0.117825	0.740103	0.76375	-0.00225653	-0.0406683	0.050884	0.0660921	0.115852	0.00870768	0.0648457	-0.0978013	-0.0595181	-0.00504727	0.000424568	PAS
1.86866	0.748952	-0.379615	1.7027	-0.786591	-0.0353158	-0.488754	-1.09014	0.411091	-0.034829	-0.00479511	0.0670724	0.107671	0.105501	-0.256808	-0.0413973	-0.0483274	0.0525727	0.0148676	PAS
3.21874	1.0474	-1.01469	-0.103267	0.57395	-0.314685	0.156105	0.465368	-0.24683	-0.163139	0.0797976	0.0701004	0.0980505	-0.0636509	0.0625228	-0.0875242	-0.0640228	0.00490771	0.0038	PAS
-10.2468	1.6574	-2.34138	1.14578	0.48711	-0.563108	0.336385	-0.271737	-0.419339	-0.0817534	0.113146	0.0726657	0.0376042	-0.116236	0.147649	-0.080556	0.0302873	0.0152579	0.0200235	PAS
-0.604108	-0.24044	-0.568202	0.344533	0.33494	0.164279	-0.801962	0.423197	-0.0621755	-0.197359	-0.0467326	0.260832	0.0368851	0.0489759	-0.0196447	-0.00252555	0.0247712	-0.0151321	-0.0242824	PAS
3.10835	0.372874	-0.0111778	-0.758218	0.074135	-0.588002	-0.71032	-0.369911	-0.169507	-0.0643195	-0.0218666	0.0962097	0.0202731	0.0763096	0.0986071	-0.0335251	0.0246529	0.00281251	-0.0242334	PAS
3.52803	1.28673	-0.3691	1.75512	-0.232899	0.312973	0.478682	-0.00133298	0.105627	0.110104	-0.0570262	-0.0812846	-0.0280751	0.00909309	0.0318247	-0.067578	0.0125575	-0.00026361	-0.0186587	PAS
0.414452	0.521674	-0.122225	-1.86746	-0.60479	-1.43607	0.135851	0.338586	0.122756	0.0839536	-0.135049	-0.0914097	-0.0128174	0.0102524	0.0289696	0.0460049	0.046407	-0.0207778	0.00961885	PAS
-3.8029	0.100926	1.7808	0.230867	-0.973875	0.378904	0.357289	-0.233711	0.024688	0.246869	0.0728344	-0.00453046	0.0542566	-0.0474907	-0.00310454	0.0291223	0.0331876	0.0922263	0.0145167	PAS
-4.05575	1.83338	3.80654	1.27037	-1.33151	-0.172622	0.559194	-0.417551	-0.63963	-0.345762	-0.381048	-0.0437602	0.129241	0.386089	0.0734377	-0.00260941	-0.147935	-0.00671893	0.0443429	PAS
1.00376	0.746363	1.64366	-1.75155	0.465403	-0.355837	0.0128485	0.378631	-0.295984	0.0156055	-0.169025	0.0781935	-0.0145267	-0.0492115	0.0490156	0.013167	0.0312321	0.0320915	-0.0201529	PAS
-0.364747	1.34397	0.345011	0.105975	1.69807	0.644909	-0.566687	0.289633	-0.050823	-0.134562	-0.0712704	0.031763	0.101231	-0.0723463	-0.120846	-0.0168684	-0.0261436	0.00425853	0.00339191	PAS
2.10187	1.41872	0.113486	-1.09639	-0.523276	-1.70071	-0.147741	0.682666	0.300599	0.2557	-0.0989368	-0.0999347	0.0334121	0.0279093	-0.0795976	0.0300764	-0.0272574	0.0303659	0.0218741	PAS
-4.85356	0.549651	2.49546	1.6382	-1.23119	0.566721	-0.00878117	-0.0476305	-0.523084	0.382368	0.48189	-0.156097	0.339314	-0.0612878	-0.0844875	0.0438622	0.0132868	0.0128131	0.0487007	PAS
3.07028	0.903086	-0.204188	1.14216	0.00205402	0.670289	0.267708	-0.223493	0.100391	0.0373972	-0.0396369	-0.151157	0.0463657	0.00980105	0.0177354	-0.085393	0.0227295	-0.00960507	-0.0146617	PAS
3.07074	0.686372	-0.894153	-0.313346	0.339711	-0.183336	0.00461084	0.387509	-0.455334	-0.15084	0.0871726	0.0490312	0.0180052	-0.0439083	-0.00424831	0.00416917	-0.0526244	0.0111603	-0.00987737	PAS
2.48721	1.39012	-0.831392	0.818924	-0.0605507	-0.186596	-0.389441	-1.01943	0.302717	-0.26952	-0.0366383	-0.0306723	0.0705077	0.0458091	0.0400438	0.0737596	0.0765826	0.0202085	-0.0199099	PAS
3.53716	1.05302	0.291549	1.19496	-0.359691	-0.0103683	-0.596913	-0.509829	0.0128309	0.0389523	-0.0479172	0.00319288	-0.0412075	0.0418863	0.0478189	-0.0736172	0.0189672	0.0024825	-0.0283305	PAS
-1.77188	-1.38615	-0.500588	-0.501804	-0.511998	0.555982	-0.613602	0.109514	-0.0133811	-0.247906	0.0124458	-0.0890746	-0.0120393	-0.0219801	-0.0814419	-0.10575	-0.00205392	0.00382738	0.0146916	PAS
5.16108	3.01514	-0.378866	3.51451	-0.399	-0.238486	0.0362197	0.267045	0.241802	0.173434	0.0634752	0.139484	0.00267945	0.0144721	-0.0590699	0.025312	-0.0588627	0.0417491	-0.026534	PAS
3.10347	0.903197	-0.454291	-0.369379	-0.260704	-0.836261	-0.852925	-0.220991	0.0761084	0.195351	0.0196599	-0.0793441	-0.0259737	0.0596252	0.0961796	-0.0802185	-0.0162075	0.0107002	-0.00827839	PAS
1.37947	0.929328	0.174938	-1.52866	-0.768973	-1.42961	-0.091938	0.566356	0.0614151	0.0819139	-0.0876515	-0.108405	-0.0394318	-0.0396746	0.0216456	0.0640927	0.0216588	-0.0224313	0.0105915	PAS
1.97746	0.534771	-1.33732	-0.620886	0.510333	0.381941	0.380681	0.107523	-0.207549	-0.144617	0.0636266	-0.0475007	0.00368873	-0.0764471	0.0958496	-0.0765635	-0.0244578	0.0234698	-0.0136072	PAS
0.813106	-0.147999	-1.42499	-1.31787	0.24494	0.397475	0.14573	-0.616471	0.0940082	-0.00312199	0.00710911	-0.076892	-0.00524789	-0.0116253	0.0483177	0.053143	0.0012061	-0.0300539	0.00690061	PAS
-1.44712	2.22233	2.82131	1.06613	1.19128	0.750774	-0.783538	0.816973	-0.0747697	-0.123173	-0.0689863	-0.109283	-0.0746979	0.0247282	-0.037286	0.169666	0.07326	-0.0226121	-0.0186332	PAS
-1.30322	-2.41683	-1.17665	-0.756171	-1.32779	0.457643	-0.603546	-0.100303	-0.177155	0.095443	0.00541179	-0.0405948	-0.0797694	0.0612575	-0.033444	-0.00464992	0.00742243	-0.0148784	0.00813249	PAS
-4.26717	1.23764	3.96072	0.971407	-1.19805	0.436888	0.247583	-0.0900383	-0.469007	-0.51555	-0.870219	-0.204224	-0.0408115	0.332613	0.166905	0.0997364	-0.31616	0.0080225	0.10527	PAS
2.9045	1.80819	0.689776	1.43942	-1.71352	-1.10996	-0.399269	0.0918954	0.344226	-0.26623	-0.105736	-0.0304575	0.00878366	-0.00574377	0.00437184	0.0782392	0.0913132	0.0225574	-0.0221637	PAS
-5.9781	1.2923	2.10233	0.678345	-0.655967	0.318147	0.085842	-0.117033	-0.277371	0.159177	0.367733	-0.0502043	-0.144376	0.147191	0.0857463	0.0544378	0.0384844	0.0177028	0.0179208	PAS
-0.346853	0.611184	1.48166	0.766765	-0.253901	0.43457	-0.485002	0.468769	-0.527894	-0.0794713	-0.207776	0.0998666	-0.0235711	-0.0671344	-0.0341112	-0.00426535	0.034965	-0.0378222	-0.0226399	PAS
-1.09927	-3.63044	-2.80747	-0.657697	-2.09747	1.24944	1.93398	2.10927	-0.239334	0.0500262	0.0443503	0.0741943	-0.0541984	0.201558	-0.00874788	0.0554264	-0.0102793	0.0229399	-0.0147118	PAS
2.48219	1.28389	-0.530013	0.951426	-0.816286	-0.376474	-0.673942	-0.914855	0.338059	-0.212425	-0.00914696	0.0373457	0.0288152	0.042909	0.0275587	0.0912	0.0597723	0.0341703	-0.0229264	PAS
3.29357	1.2891	0.0159229	0.424461	0.19291	0.166254	-0.82452	-0.963057	-0.0777677	0.0278033	-0.0225087	0.0923777	0.0283196	0.0434118	0.0605779	-0.0500714	-0.00383516	-0.0073284	-0.0312401	PAS
-1.68978	-0.560076	0.84754	0.285232	-1.0064	0.522673	-0.325691	0.373731	-0.33653	-0.0999726	-0.117149	0.0317004	-0.0166521	-0.077737	-0.0562337	-0.0833132	0.0135821	-0.0286745	0.0061152	PAS
-3.55441	-1.80793	1.52315	0.882587	-1.09741	1.73717	-0.581611	0.487935	0.283021	0.430788	-0.0869985	0.185923	0.0537186	-0.0188506	0.026818	-0.0241652	0.00793815	0.0408515	0.0174799	PAS
-0.392121	2.19656	0.503632	-1.76142	0.632461	-0.534189	0.578098	-0.325024	-0.248437	-0.10459	-0.195521	-0.129561	-0.0482246	-0.0823052	0.00283493	0.037111	0.0643044	0.00444139	-0.0104298	PAS
1.17693	-1.00814	-0.975977	0.794638	-1.04778	1.86216	1.36293	-0.09321	0.102108	-0.258141	-0.0323685	0.0444323	-0.00963961	0.0277746	-0.0495937	0.0414709	0.0466986	3.60477e-05	-0.0261982	PAS
1.59237	0.12507	-0.69631	0.798518	-0.926136	0.700104	0.126736	-0.46246	0.31646	-0.0773003	-0.0255013	-0.174569	0.00964844	-0.0105917	0.00836715	-0.0299812	0.0320632	-0.0179285	-0.000716559	PAS
-3.3071	0.510189	1.66215	1.06289	-0.411652	0.556337	-0.628227	0.840894	-0.405662	0.0338329	-0.101785	0.0608288	0.0216036	-0.00466233	-0.0277647	-0.049333	0.0233502	-0.0635591	0.00571849	PAS
0.368611	-1.66323	-1.21555	-0.157902	-1.55726	0.902597	0.984903	0.23891	-0.648707	0.07383	-0.0798649	0.015431	-0.0709614	0.0008551	-0.0467017	0.0348082	0.0083891	-0.0106354	-0.016652	PAS
1.31744	0.209833	-1.32948	-0.716277	-0.1877	0.33376	0.130294	-0.193424	0.210981	0.145078	0.0186782	-0.159049	-0.0121834	-0.0136109	0.0214227	0.0680228	-0.014659	-0.0276951	0.0100068	PAS
-0.34382	-1.92237	-0.903218	-1.36977	-0.943624	0.668554	-0.870033	-0.655641	0.00640604	-0.154094	0.101111	-0.156648	-0.0606206	0.0327661	-0.0180338	-0.0419982	0.00805722	0.00945787	0.0164606	PAS
0.278859	-1.44425	-1.641	-0.66404	-1.38841	0.3359	0.945097	0.577154	-0.770386	0.186548	-0.142295	0.176482	-0.0397295	0.110361	-0.0425503	0.0331815	0.00589953	-0.0101011	-0.0335184	PAS
1.17527	0.0845453	-1.64299	-0.787139	0.169976	0.910714	0.639745	-0.063628	0.173821	0.133154	0.0286874	-0.148702	0.00835688	-0.0315486	0.0149898	0.0876492	-0.0288616	-0.0255968	0.00838281	PAS
2.06163	-0.812649	0.156562	-1.27548	-1.03887	0.0561813	-0.786992	-0.465748	-0.340546	-0.224208	0.0551376	-0.0197116	0.000346523	4.20739e-05	0.0333929	-0.00367225	0.0183368	0.00658065	-0.0100526	PAS
1.22832	0.142285	-1.53207	-0.717463	0.125167	0.916906	0.614887	-0.0397662	0.232283	0.193847	-0.00946376	-0.191879	0.0362849	0.0155583	-0.00519568	0.0748603	-0.0116227	-0.0171687	0.00384491	PAS
1.60049	-0.605097	-0.203033	1.20361	-2.1746	0.747129	0.309905	-0.186902	0.314045	-0.144834	-0.038885	-0.106752	-0.00594141	-0.0203904	0.0227812	-0.0654626	0.0513823	-0.0131683	-0.00289431	PAS
0.102833	-1.44019	-0.712044	-1.08284	-1.313	0.629425	-0.0914827	-0.608904	-0.139041	-0.202728	0.00163739	-0.124637	-0.0808816	-0.00102445	0.00746288	0.00660282	0.0596248	-0.0135042	-0.00101554	PAS
-4.24479	0.442183	2.02621	0.508788	-0.615849	0.90227	-0.24885	0.368011	-0.158644	-0.233506	0.0875007	0.138808	-0.0385326	0.0784625	-0.065598	-0.050539	0.0286516	-0.00176663	0.0108946	PAS
2.80934	0.864058	-1.10484	-0.538299	0.344617	0.245568	0.0233278	0.363777	-0.488011	-0.172028	0.065743	0.0349421	-0.0373092	-0.0415594	0.0435343	-0.0467532	-0.0455558	0.034305	-0.0394185	PAS
0.282806	-1.45529	-0.277613	-1.4639	-0.553203	0.622148	-1.04875	0.0479991	0.00638559	-0.124798	0.0622386	-0.123686	-0.0867791	0.0320191	-0.000359829	-0.0198529	0.00793461	0.02479	0.00283329	PAS
-9.40852	2.33891	-2.23272	1.10456	0.57908	-0.25887	0.0635775	-0.0419497	-0.508188	-0.100333	0.0814739	0.0958388	0.0621268	-0.161367	0.159401	-0.101719	0.0302988	0.0119185	0.0302585	PAS
1.46085	-1.05475	-0.0841312	-0.501831	-1.94617	0.17705	-0.423399	-0.14132	0.0691747	-0.132372	0.0353891	-0.190862	0.0125821	-0.024145	0.0767407	-0.0913694	0.0364793	-0.0248216	0.011628	PAS
-2.50645	0.390352	1.71765	1.03854	-0.811563	0.586922	-0.660592	0.908973	-0.454577	-0.053004	-0.0901006	0.0722537	0.042191	-0.0613587	-0.030024	-0.0721454	0.0178359	-0.0589695	0.0103771	PAS
1.8466	0.128877	0.440248	-0.104758	0.494408	1.79098	-0.333572	-0.732011	0.128541	0.125596	-0.0561104	0.210741	0.0969944	-0.0558259	-0.0073681	0.0922568	-0.059604	-0.0152541	-0.00420947	PAS
0.975047	-1.65067	-0.569056	-0.42338	-0.271196	1.55017	-0.465963	1.24074	0.248012	-0.227944	0.0427925	0.0892413	-0.0785365	0.0567368	0.0334284	0.044916	0.0011758	0.0127309	-0.0236833	PAS
1.41899	0.638727	-0.821516	-1.92796	-0.135997	-0.520253	-0.305996	-0.0151093	-0.0145675	0.0830574	-0.0234469	-0.0325637	0.005488	-0.0117426	0.0579305	0.0109195	-0.0238091	-0.0196062	0.000923913	PAS
1.64403	-0.663001	-0.164565	-0.790166	-1.29142	-0.425832	-0.995927	0.398392	-0.60529	0.0561234	-0.0351116	0.100859	-0.0401005	0.063727	-0.011292	0.0173529	-0.00460775	-0.0120036	-0.0220924	PAS
2.11771	0.878734	-1.07603	-0.135906	0.423172	0.863508	-0.519527	-1.19938	0.0226763	0.0442006	0.0357193	0.00908083	-0.00214959	-0.0289178	0.0645815	0.0232037	-0.0414494	-0.0328645	-0.0128691	PAS
2.03462	0.23772	-0.259512	1.44846	-2.25321	0.0960962	-0.296177	-0.282133	0.460728	0.0166046	-0.0347834	-0.196576	-0.0178553	0.00195759	0.0300238	-0.0510121	0.0414373	0.00873667	0.00108013	PAS
2.41048	-0.529043	0.0518789	-0.529181	-1.35712	0.288004	-0.373085	0.151481	-0.18836	-0.280714	0.0472885	-0.0313082	0.0712355	-0.0195433	0.0226929	-0.0409291	0.0147164	-0.00178679	-0.0106859	PAS
-7.66999	1.95967	-2.08259	1.16291	0.626305	-0.0843325	-0.372968	0.454178	-0.308028	0.0757066	-0.0807408	-0.0421681	-0.022733	-0.159839	0.159163	0.0377468	0.0756871	-0.0358353	0.0183565	PAS
0.732059	-1.63357	-1.09157	0.00116957	-0.483975	1.73127	0.0506764	1.40314	0.109174	-0.203611	0.0516316	0.026528	-0.102052	0.0710938	-0.0360231	0.0982345	0.00901356	-0.00410716	-0.0261439	PAS
0.573565	1.47311	0.22287	-0.856798	0.654405	0.507698	-0.208821	-0.221956	-0.0304328	-0.321379	-0.157385	0.0555433	0.213099	0.031363	-0.045742	-0.0136763	0.052126	0.0248935	-0.0276874	PAS
0.080614	-2.42844	-1.83209	0.0171057	-0.953885	2.63572	1.55749	1.09734	0.0518517	-0.0556524	0.0121693	-0.0554289	-0.0810519	0.118327	-0.000373106	0.0975661	0.0418465	0.00931263	-0.0294665	PAS
-6.53843	1.77858	1.52907	0.645234	-0.481953	0.396683	0.0920197	-0.167497	-0.3855	0.113708	0.0450442	-0.0393154	-0.153846	0.140159	0.0866	0.0770776	-0.0142955	0.0235506	0.0411432	PAS
-0.827612	-0.23439	-0.00391756	-0.276791	-0.0985241	0.946314	-0.816984	0.39393	-0.0357394	-0.27192	-0.0593385	-0.00505923	-0.0452459	-0.0151644	-0.0703302	-0.0921605	0.00215527	0.0167025	-0.00551238	PAS
0.94598	-1.60707	-0.687448	-0.541196	-0.197199	1.61572	-0.502021	1.2589	0.213479	-0.186775	0.044878	0.113808	-0.0556507	0.0848663	-0.0072406	0.0677566	-0.011213	-0.00460422	-0.0222446	PAS
1.36753	0.0453673	-0.771441	0.263336	-1.07153	0.535558	-0.751598	-1.13392	0.200909	-0.0727265	0.0248491	-0.0895555	-0.0203323	0.00163238	0.0477926	-0.0313765	0.0120532	-0.0331456	0.0013853	PAS
2.30714	0.725249	-0.673849	0.564694	-0.797411	0.370637	-0.764109	-0.837723	0.240918	0.0302249	0.00508096	-0.0930326	-0.0287114	0.00836056	0.0610775	-0.00446958	-0.000891368	-0.00525791	-0.0124296	PAS
2.56567	1.1875	-1.11853	0.0738752	0.462701	0.870384	-0.43891	-0.94455	0.0089131	0.0805997	0.0345777	0.0322772	-0.00378565	-0.0294265	0.0741585	0.0284286	-0.055206	-0.0254942	-0.0226288	PAS
2.27391	-0.721529	0.0255008	-0.991296	-1.45962	0.255198	-0.468939	-0.250757	-0.240775	-0.214936	0.0290273	0.0218423	0.0798185	0.013945	0.0393904	-0.0746542	0.00928463	-0.0122379	-0.00918019	PAS
0.45509	0.525672	1.97422	0.720013	-0.775514	0.766815	-0.622858	0.69594	-0.471618	-0.0923007	-0.139547	0.0992033	-0.036671	-0.106979	-0.040312	-0.0182796	0.0134193	-0.03952	-0.0139453	PAS
0.826206	0.798366	-0.373535	-2.54827	-0.417844	-0.902771	-0.0952884	0.441178	-0.0873127	0.0664298	-0.109287	-0.0696473	0.00874316	0.00763917	0.0373817	0.0319439	0.0209889	-0.0177987	-0.00349987	PAS
3.44304	1.15964	1.24654	0.588712	-1.50313	-0.097919	-0.455101	0.0475472	-0.250548	-0.226459	-0.0674119	0.0130305	0.0620498	-0.0624942	-0.0124631	-0.0604207	0.0134217	-0.0197334	-0.0236046	PAS
2.02264	0.922927	-1.56502	-1.71885	0.687112	0.119242	-0.650451	-0.631518	-0.0627541	0.15983	0.0495384	-0.0576617	0.0370492	0.0197147	0.0998878	0.0437938	-0.047958	-0.0383444	-0.012556	PAS
2.76184	1.27361	-0.738999	0.813705	-0.760795	0.248847	-0.591586	-0.742592	0.148328	-0.176909	-0.00378797	0.0740193	0.0367892	0.0458886	0.0300531	0.0927312	0.0368025	0.0283641	-0.0425631	PAS
1.54517	0.0173571	-0.688219	0.306035	-1.27785	0.497244	-0.977749	-1.20235	0.247366	-0.0478661	0.0343882	-0.0904426	-0.0103076	0.0327243	0.0595351	-0.0625035	0.0142573	-0.0125987	-0.00181802	PAS
0.509824	2.16088	-0.00104819	-0.751929	0.684228	0.233337	-0.252492	-0.0433313	0.144034	-0.198066	-0.181563	-0.0385589	0.15027	0.0171945	-0.024462	0.0547027	0.0580114	0.0411594	-0.0297305	PAS
-8.51919	1.56269	-2.04111	1.01392	-0.0607995	0.0450132	-0.141768	0.255222	-0.422526	0.053194	0.0265867	0.0678631	-0.00808439	-0.203778	0.13555	0.00697015	0.0472433	-0.0192787	0.0411802	PAS
2.39621	0.358377	-0.208713	1.22978	-2.29714	-0.134007	-1.04462	-0.695738	0.37141	0.0212205	-0.00569123	-0.169061	-0.0226487	0.0635135	0.0468093	-0.0665223	0.0410168	0.00584596	-0.00651049	PAS
2.51167	-0.162412	-0.348341	-0.874214	-1.02251	0.191845	-0.618886	0.0336005	-0.266749	-0.187115	0.0568661	0.044022	0.052586	0.011114	0.00180483	0.0311806	-0.0126214	0.00217347	-0.0181829	PAS
2.34659	1.36803	-1.34627	0.00561145	0.627	1.07289	-0.2923	-0.9147	0.0384083	0.0918252	0.0505571	-0.0117175	0.00948887	-0.0508728	0.0662728	0.0609397	-0.0575614	-0.0244801	-0.0234502	PAS
1.94205	-0.357967	-0.686921	-1.03854	-0.597407	0.838014	0.0296863	0.0581114	-0.249079	-0.11987	-0.0168103	0.0109953	0.0416921	0.059487	-0.0287152	0.0766019	0.0210586	0.00993646	-0.0309702	PAS
3.2924	1.89407	0.354614	2.01681	-2.53102	-1.10101	-0.819866	0.339335	0.432951	-0.00781265	-0.105569	-0.113266	-0.0269673	0.0517644	0.0166287	-0.0161124	0.0597864	0.026888	-0.0288323	PAS
2.84249	1.00098	0.204323	1.6528	-2.61728	-0.62487	-0.871878	-0.0670674	0.439885	0.0616352	-0.0603008	-0.156243	-0.0523033	0.0479752	0.0148812	-0.00696237	0.0478873	0.0137992	-0.0120795	PAS
2.92406	0.0759329	0.364966	1.12471	-2.24007	0.338463	-0.728429	-0.429894	0.124221	-0.101007	0.0170959	-0.0717148	0.0553508	0.042208	-0.0455918	-0.0673928	0.015007	-0.0469566	-0.00414209	PAS
-0.181859	-0.865124	-0.403782	-2.03092	-1.08968	0.409475	-0.179228	-0.492076	-0.330975	-0.0656343	-0.0543895	-0.224401	-0.0433947	0.0071479	-0.0475552	0.000181476	0.0499369	0.0096586	0.00818559	PAS
1.98129	0.922617	-0.129488	-1.7143	-1.04308	-1.04482	-0.400543	0.786141	-0.0281679	0.243448	-0.0294238	-0.0873236	-0.00788438	-0.0443984	0.0356092	0.0226522	-0.0399174	-0.0120774	0.00659835	PAS
1.85978	0.746569	-1.5584	-0.710991	0.0567548	0.779786	0.277023	0.154849	0.158739	0.236515	0.0323305	-0.217346	0.0522138	-0.00990719	0.00703546	0.0529954	-0.0516211	-0.0146991	-0.00335481	PAS
3.28573	0.682307	0.498492	0.803488	-1.71022	0.124724	-0.782538	-0.372008	-0.0955537	-0.244682	0.00945227	0.0730041	0.0499324	-0.0329232	0.0169684	-0.0119278	0.00656858	-0.0167271	-0.0218341	PAS
1.9863	-0.126895	-0.434576	0.297552	-0.713902	1.56266	0.213676	-0.331338	-0.130139	-0.285227	-0.0371236	0.078206	0.0417235	0.0234991	-0.0307316	0.0138935	0.0328957	0.00340479	-0.0397473	PAS
2.56255	1.19198	-1.18743	0.670376	-0.3639	0.87474	0.0665347	-0.419243	0.128867	0.0656886	0.0245379	-0.0390517	-0.0124493	-0.0578347	0.0509699	0.0770372	-0.0380105	-0.00408137	-0.0229418	PAS
2.50584	-0.0215499	0.109003	1.14735	-2.34065	0.330263	-0.621764	-0.397619	0.178642	-0.0830771	-0.0156752	-0.0792275	-0.0145698	0.0525334	0.00639637	-0.0785973	0.0421151	-0.035542	-0.0125576	PAS
3.12023	1.66213	-0.324352	0.547959	-0.642493	0.0789947	-0.655855	-0.504695	-0.00815558	0.0604817	0.00211028	-0.0680968	-0.0111279	-0.0609347	0.0260388	0.00659368	-0.043129	-0.00929126	-0.0192121	PAS
1.83556	-0.675859	-0.448333	-0.916022	-0.93614	1.0337	0.163512	0.153338	-0.133635	-0.145727	-0.053059	0.0367139	0.0555561	0.0687018	0.0396359	-0.0071824	0.0464815	0.00899368	-0.034855	PAS
3.43801	1.82678	-0.232706	1.02195	-1.14085	-0.251348	-0.720809	-0.187527	0.12283	0.118087	-0.0226046	-0.0368254	-0.0450547	-0.0146456	0.0080985	0.0430965	-0.0307096	-0.00757768	-0.0266671	PAS
-5.29008	2.76841	-0.270512	1.76755	0.48389	0.040039	-0.834264	1.00537	-0.585783	-0.00874315	-0.0486688	-0.00637413	-0.0335936	-0.194602	0.176235	0.0425959	0.0576377	-0.0246126	-0.000146951	PAS
3.48198	1.8639	-0.542429	0.759673	-0.594311	0.0178417	-0.786555	-0.473311	-0.0334971	0.0695395	0.0345424	0.019456	-0.0303401	-0.0467616	0.0224408	0.0119639	-0.0712298	-0.0235969	-0.0267961	PAS
2.20184	1.18148	-1.65177	-1.18847	0.515393	0.467817	-0.154512	-0.0637434	0.0148004	0.239129	0.0387562	-0.07476	0.0460445	-0.000998301	0.0560096	0.0663614	-0.074824	-0.0298548	-0.0173577	PAS
-0.101333	0.975057	0.0249973	-2.45668	-0.313517	-0.230889	0.20835	0.0222031	-0.1764	0.0729523	-0.186007	-0.0737899	-0.0456401	-0.0124195	0.0216278	0.0564786	0.0527438	-0.00388275	-0.00974494	PAS
1.99239	-0.121426	-0.646602	-1.17269	-0.780504	0.362982	-0.560591	-0.138617	-0.221908	-0.130594	0.00401093	0.0981872	-0.0431421	0.053964	0.0131782	0.0677188	0.00627989	0.0279827	-0.034538	PAS
-3.59091	0.140321	1.0006	0.0799838	0.109293	1.57737	-0.879803	0.867277	0.238232	-0.193881	-0.0822284	0.0605993	-0.119463	0.046654	-0.0480653	-0.0344671	0.0393185	0.00777803	0.00895363	PAS
3.21435	1.47779	0.657205	2.04096	-3.10175	-0.969588	-0.858171	0.485655	0.376396	-0.00598131	-0.0754095	-0.174621	-0.0901688	0.0177635	-0.0151245	-0.00023486	0.0554219	0.0029663	-0.0168778	PAS
3.11182	1.17209	0.520766	1.8158	-2.869	-0.618729	-1.01169	0.0609779	0.371817	0.0418662	-0.0216326	-0.270916	-0.0773317	0.038185	-0.0439197	0.0102511	0.0531988	-0.0206459	-0.00737661	PAS
0.691175	-0.829828	-0.439098	-1.60197	-1.43293	0.395521	-0.580455	-0.536638	-0.0688812	-0.0416621	-0.026951	-0.0981885	0.0188576	0.0289273	0.0894634	-0.0700881	0.041201	-0.0166663	0.00450341	PAS
1.8933	1.05748	-1.5256	0.116854	0.431304	1.70146	0.366185	-0.466171	0.0782393	0.132714	0.0222386	-0.0918868	0.0481889	-0.0493223	-0.00393834	0.0721426	-0.063902	-0.0309077	-0.0194805	PAS
2.24695	0.857759	-0.520592	-1.36438	-1.00374	-0.629565	-0.59641	0.512844	-0.00968036	0.299369	0.011547	-0.0230028	-0.00104786	-0.050598	0.044462	-0.0100126	-0.0939832	-0.000361556	0.00576101	PAS
1.98634	1.12377	-1.66939	0.291214	0.448956	1.77617	0.523806	-0.318861	0.13074	0.184024	0.00620028	-0.0340743	-0.0193355	-0.0414751	0.0390787	0.121796	-0.0581915	-0.0100365	-0.0335489	PAS
1.98838	0.870937	-0.911374	0.0170886	-0.436396	0.759666	-0.780411	-0.992406	0.158959	0.309292	0.027841	-0.0392828	0.0251734	0.0122933	-0.0207814	-0.014587	-0.0867008	-0.00345018	-0.00146261	PAS
-2.94934	0.393038	1.18604	-0.0072041	0.791572	1.88815	-1.19029	1.10493	0.406178	-0.233168	-0.112235	0.0191588	-0.121326	0.0606158	0.000191202	-0.0483347	0.0402074	0.0095562	-0.00361464	PAS
2.49287	1.37208	0.222588	1.14485	-2.16906	-0.374871	-0.67421	-0.0443174	0.277342	0.0983114	-0.144893	-0.18413	-0.0386491	0.0581672	0.00749659	-0.0852656	0.0432165	0.00948188	-0.0213697	PAS
1.88169	0.919159	-1.19243	0.123946	-0.0739918	1.42332	-0.0286823	-0.608178	0.144692	0.212968	0.0210568	-0.160159	0.0430504	-0.0418092	-0.00331614	0.0260968	-0.0582366	-0.00375645	-0.010939	PAS
0.289668	3.19422	0.387701	-1.25412	0.8129	-0.205317	-0.160178	0.373392	-0.0711842	-0.196551	-0.182531	-0.0657525	0.265652	0.000208111	-0.0714701	0.0174269	0.0295932	0.0331778	-0.0262923	PAS
0.0834506	0.00542677	-0.10596	-2.74426	-1.01831	-0.0470738	-0.0946619	0.119237	-0.2127	0.062099	-0.167634	-0.153445	-0.00901326	0.0491579	0.0433892	0.0300141	0.0791705	-0.0159486	-0.00372743	PAS
-5.10112	-1.42034	1.67644	-1.07107	-0.372991	3.26744	0.0416013	-0.654746	0.233847	0.126361	0.0579142	0.080719	-0.22417	-0.0340512	-0.13449	0.0430121	-0.0046876	0.0411746	0.074293	PAS
1.2005	0.838236	0.122474	-0.207985	-1.32698	0.601839	-0.331167	-0.412669	0.0484969	0.000364818	-0.126138	-0.143588	-0.0192073	-0.0148912	0.0233881	-0.0503336	0.044122	-0.0205987	-0.0111137	PAS
-3.55348	-3.02477	2.66944	-2.03943	-1.78389	3.11132	0.000932987	-0.137502	0.177474	0.34414	0.0248362	0.162421	0.0210005	-0.0810889	-0.000836018	0.0312394	0.00472655	0.00197027	0.110724	PAS
-8.60382	3.37424	-0.591297	0.838355	-0.0443275	0.283088	0.0129098	-0.191416	-0.663129	-0.127645	0.282027	0.0393204	0.00013284	-0.0899431	0.160651	-0.0266211	-0.00632375	0.0239171	0.0653514	PAS
0.640512	1.16595	0.437006	-1.91412	-1.07528	-0.0570033	-0.0254767	0.312906	-0.202361	0.071354	-0.225786	-0.0526678	-0.0536431	-0.00757749	0.0433322	0.0360576	0.0581094	-0.00893944	-0.018205	PAS
0.0888197	3.83434	0.85845	-1.96017	0.692199	-0.585994	-0.177536	0.792827	-0.22584	-0.0567531	-0.190425	-0.13026	0.298835	0.0239126	-0.0429914	0.00611066	0.0214823	0.046499	-0.0295343	PAS
3.06581	2.01594	-1.31356	0.542337	-0.231995	1.02442	-0.365085	-0.412577	-0.0321586	0.266652	0.0511772	-0.0634104	0.000797152	-0.0757688	0.0389885	0.0356759	-0.119385	0.00350045	-0.0436025	PAS
-6.92267	3.49486	-0.790606	1.41922	0.158572	0.115791	-0.431023	0.486081	-0.811788	0.0250369	0.123222	0.0843998	0.0501538	-0.175428	0.184135	0.0345047	0.0723927	-0.0487885	0.0173715	PAS
3.14528	2.09052	-1.39067	0.257986	0.286368	1.29332	-0.527353	-0.395271	-0.0777652	0.234624	0.0739453	0.0016322	0.0358964	-0.0632559	0.04518	0.0402005	-0.140757	-0.00750138	-0.0546764	PAS
3.93433	3.20625	-1.06791	1.1348	-0.704608	-0.131363	-1.09995	-0.13073	0.0639508	-0.0191748	0.0895043	-0.00706364	0.103779	-0.0538752	-0.000252828	0.109843	-0.0903518	0.0380598	-0.0650262	PAS
3.33082	2.35204	-1.47428	0.31993	0.107259	1.10153	-0.525382	-0.508626	-0.120413	0.24627	0.0903961	-0.0160272	0.0330696	-0.0738258	0.0227543	0.0675269	-0.149364	-0.00727629	-0.0562703	PAS
0.462757	-1.9805	3.52456	-0.627762	-2.69155	2.26853	-0.805795	0.744221	0.0234865	0.155051	-0.0526518	0.15761	-0.0251919	-0.0724047	0.0204851	-0.00221125	0.0285547	0.00885945	0.0586488	PAS
-1.46093	-1.38382	-1.74072	-0.478574	-1.48844	1.76684	0.317605	-1.81935	0.646171	0.00355335	-0.0247604	0.184416	-0.0259013	0.0178842	0.0423159	-0.0191722	0.0134521	-0.0086567	0.0261976	PAT
-2.4152	2.57068	-0.277446	-0.679939	-1.20497	-0.231029	0.947429	-0.503043	0.745176	-0.297199	-0.144259	0.209951	0.0400945	-0.116753	0.0177476	-0.0145741	0.0383353	0.0134902	0.0283596	PAT
-1.86921	1.91621	1.34401	0.065711	1.99119	3.14652	-0.973908	0.0241387	-0.12682	-0.132359	-0.0544795	-0.139335	0.332765	0.0392202	-0.148322	0.0276703	0.0423757	0.0179528	-0.0169661	PAT
0.429503	3.65247	1.44034	0.647819	-2.74001	-0.895888	0.123313	0.655679	0.57929	-0.250577	-0.10689	0.0547446	0.0873991	-0.165804	0.105271	0.128025	0.0802326	0.109913	0.00296247	PAT
-2.91967	1.83449	-1.66379	-1.72069	-0.613667	1.44091	0.862775	-1.01618	0.434572	0.185391	-0.188806	0.137834	-0.155582	-0.0358875	-0.14192	-0.0215484	-0.0170675	-0.0605137	0.0288009	PAT
-3.17381	2.34309	-1.57354	-1.13057	-1.64419	0.729034	0.709587	-0.526519	0.677711	-0.109552	-0.133045	0.203466	0.0159772	-0.111553	-0.0524689	-0.112432	-0.0122153	-0.0209616	0.0535938	PAT
-2.82663	5.39859	0.534151	-2.73742	-0.986152	-1.452	0.569686	0.61351	0.353889	-0.0175922	0.17457	0.0991417	-0.0337554	0.130121	-0.0350681	-0.0731781	0.0102911	-0.0397006	0.0104559	PAT
-2.47212	6.57547	0.63323	-2.14623	-0.280192	-1.16088	0.610543	0.322866	0.286451	-0.0622492	0.22074	0.133652	-0.00133363	0.0757887	-0.0431463	-0.0491353	-0.00925035	-0.0279651	-0.0231791	PAT
-2.18927	7.29516	0.932975	-2.10749	-0.237524	-1.55403	0.515505	0.547393	0.266059	-0.057081	0.30447	0.119487	0.0143594	0.101168	0.0227463	-0.0556376	-0.00303064	-0.00969423	-0.0419883	PAT
-2.40049	4.55469	-0.711215	-1.83693	-0.769552	0.172178	0.556925	-0.0406196	0.393354	0.10106	-0.0895647	-0.0397688	-0.0709045	-0.0908614	-0.091497	0.0152277	-0.024987	-0.0396855	0.0113649	PAT
-2.66912	6.31693	-0.0432574	-2.69305	-0.92475	-1.49224	0.398056	0.880353	0.328798	-0.0289424	0.175534	0.100639	0.0200889	0.0399182	-0.0635713	-0.0975416	-0.0530275	-0.0522115	-0.0019027	PAT
